# Supplementary material
Source: PubMed Central journal article supplement (PMC3898789)

## Supporting Information

### **Stereocontrolled Syntheses of Peptide Thioesters Containing Modified Seryl Residues as Probes of Antibiotic Biosynthesis**

Nicole M. Gaudelli and Craig A. Townsend\*, Department of Chemistry, Johns  
Hopkins University, 3400 N. Charles Street, Baltimore, MD 21218

\*ctownsend@jhu.edu

#### **Contents:**

**NMR Spectra of New Compounds.....S2**

**HPLC Chromatographs of Chemical Epimerization of Thioesters .....S36**

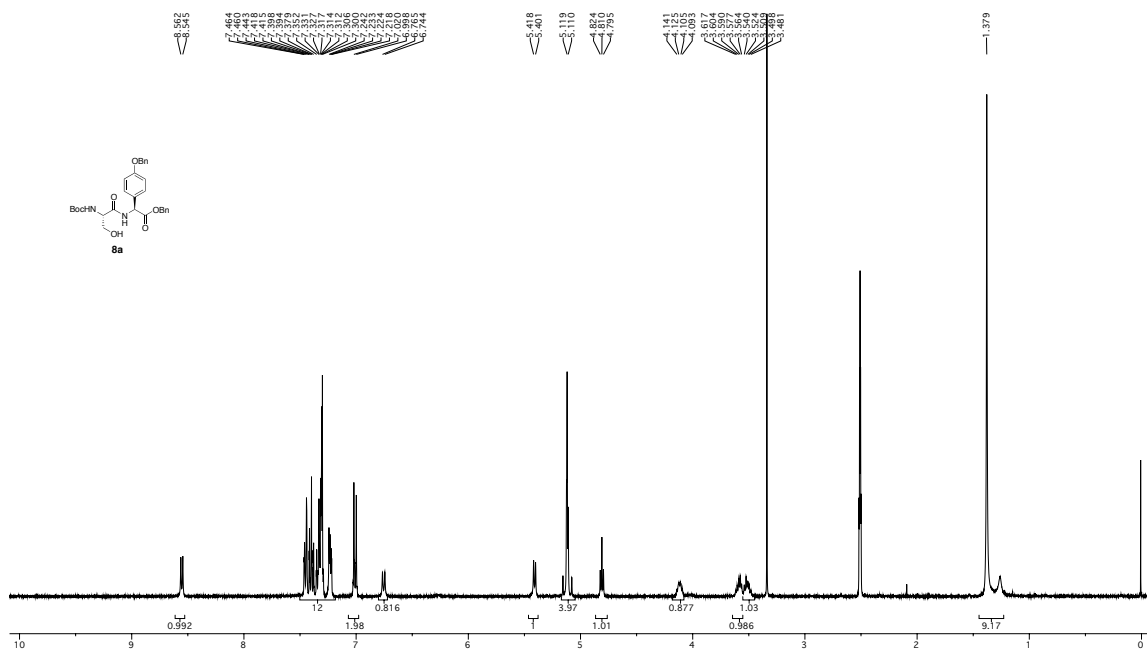

400 MHz <sup>1</sup>H-NMR Compound 8a – d<sub>6</sub>-DMSO with TMS

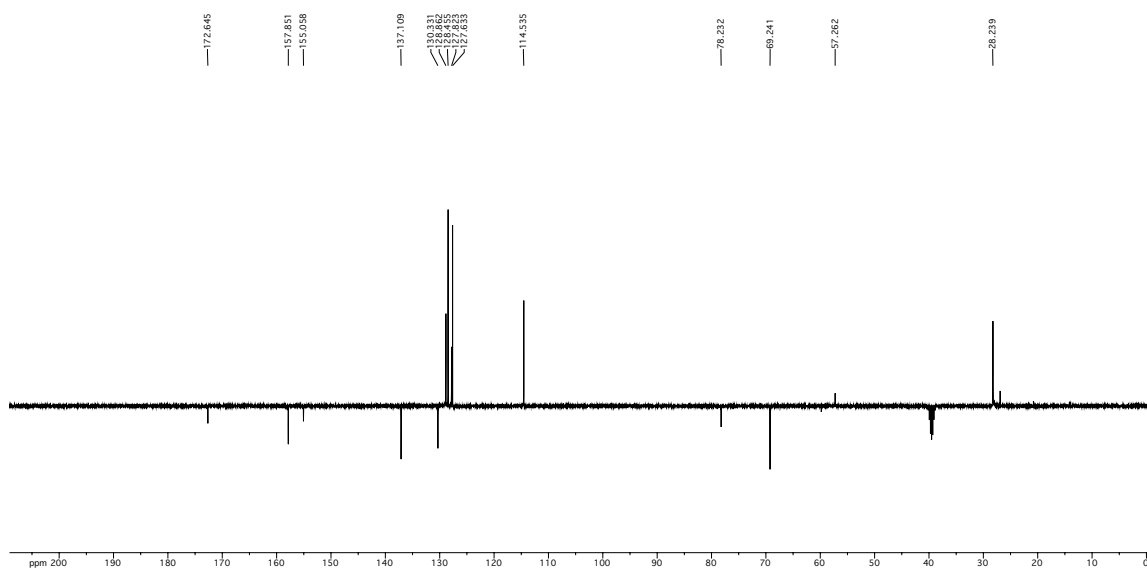

101 MHz <sup>13</sup>C-NMR Compound 8a – d<sub>6</sub>-DMSO with TMS







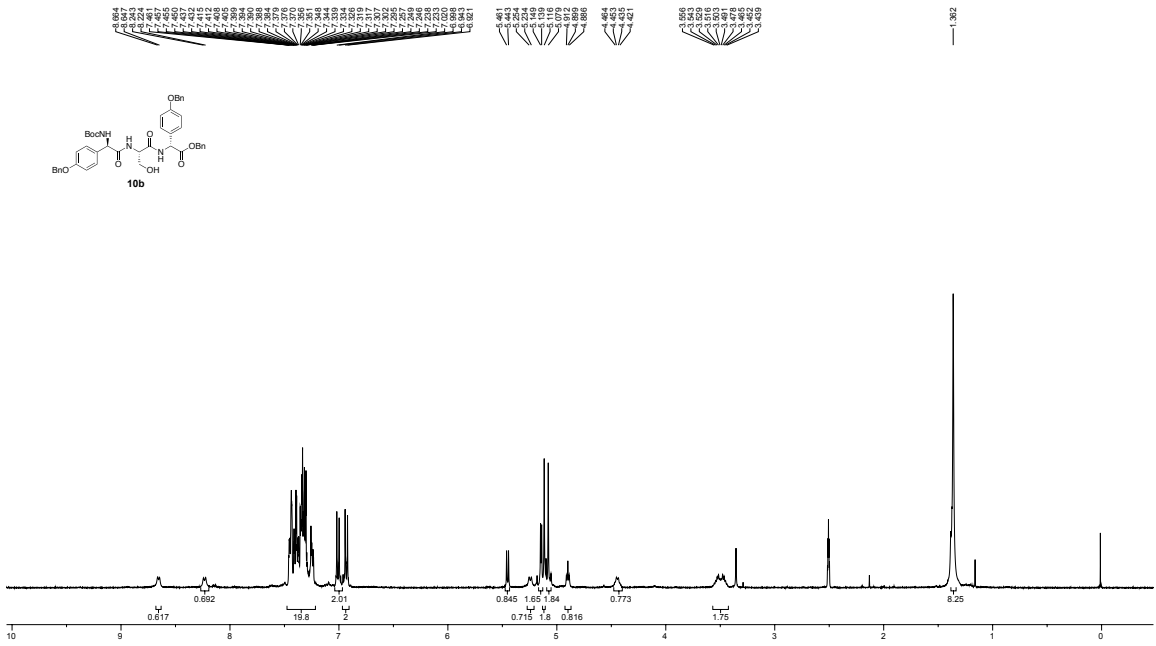

400 MHz <sup>1</sup>H-NMR Compound 10b – d<sub>6</sub>DMSO with TMS

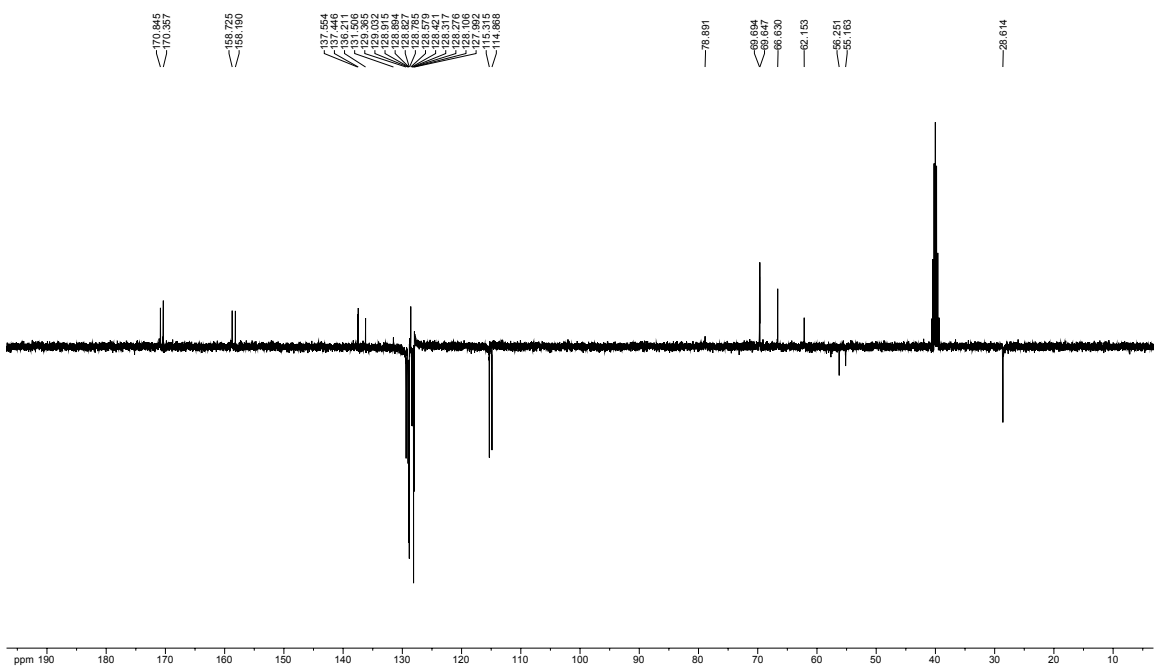

101 MHz <sup>13</sup>C-NMR Compound 10b – d<sub>6</sub>DMSO with TMS

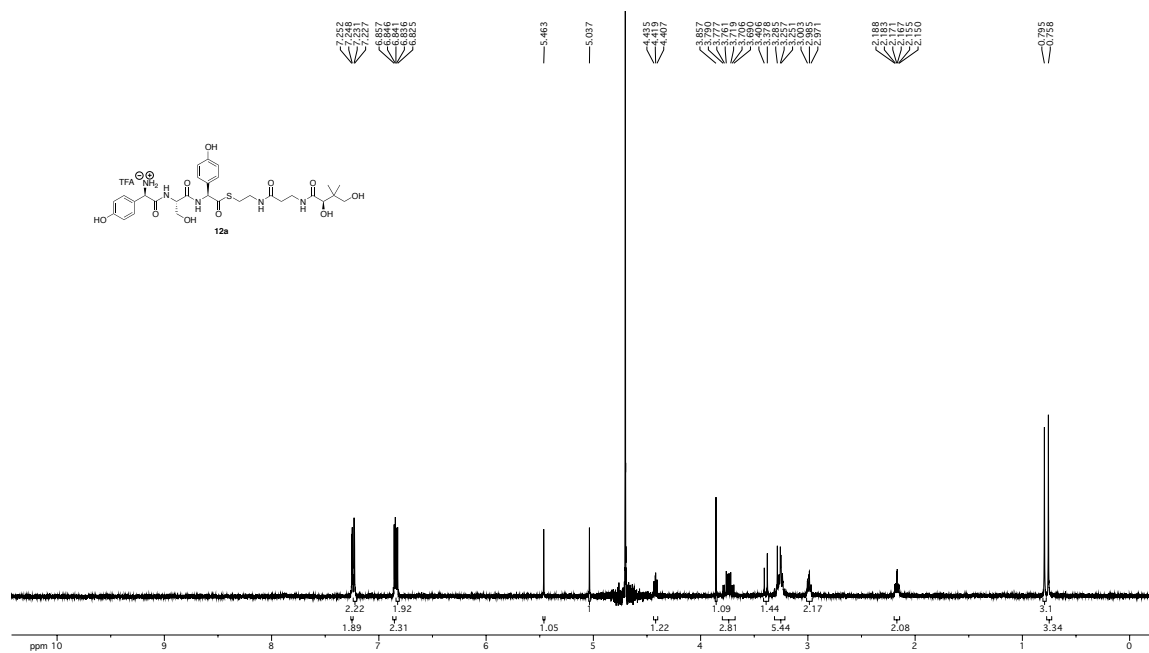

400 MHz <sup>1</sup>H-NMR Compound 12a – D<sub>2</sub>O

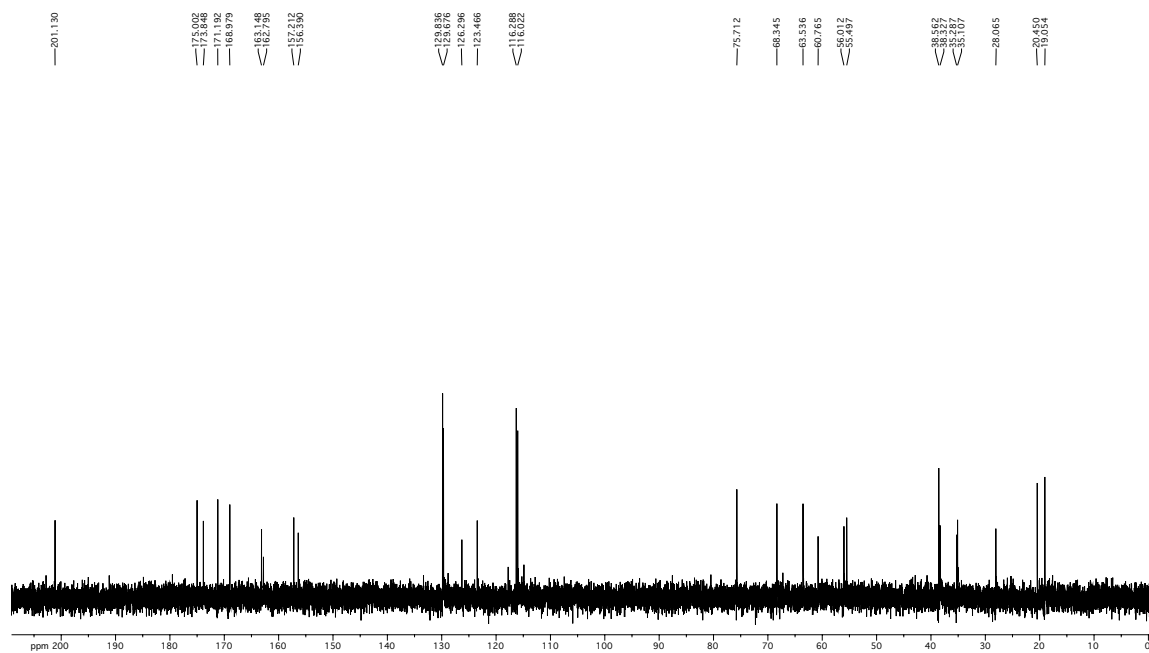

101 MHz <sup>13</sup>C-NMR Compound 12a – D<sub>2</sub>O

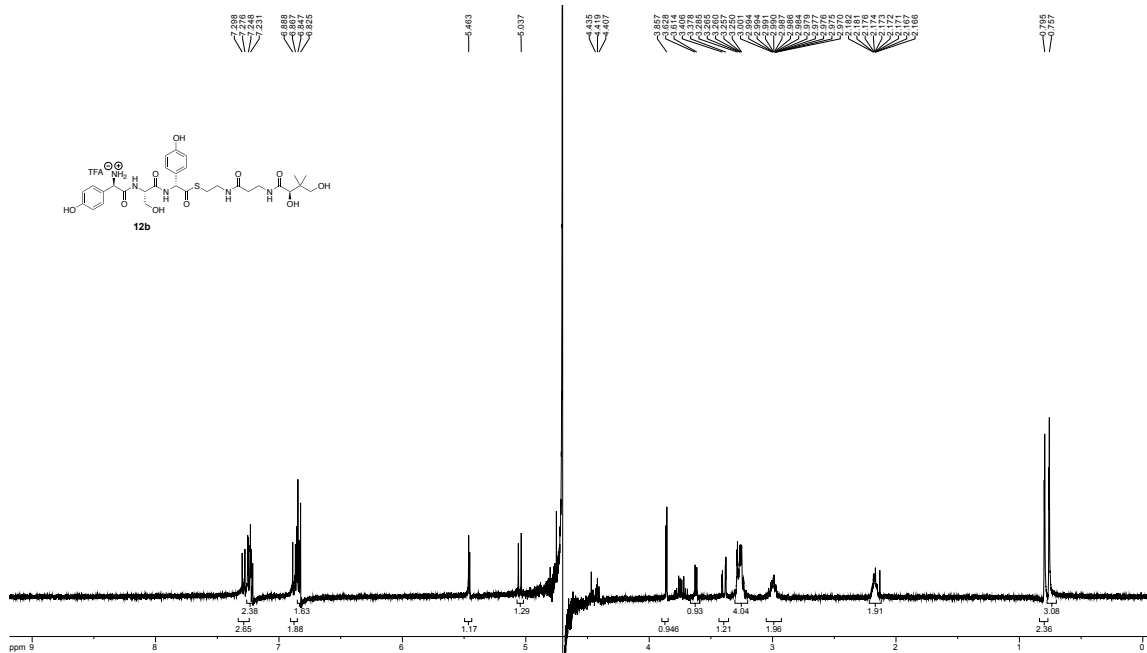

400 MHz <sup>1</sup>H-NMR Compound 12b – D<sub>2</sub>O

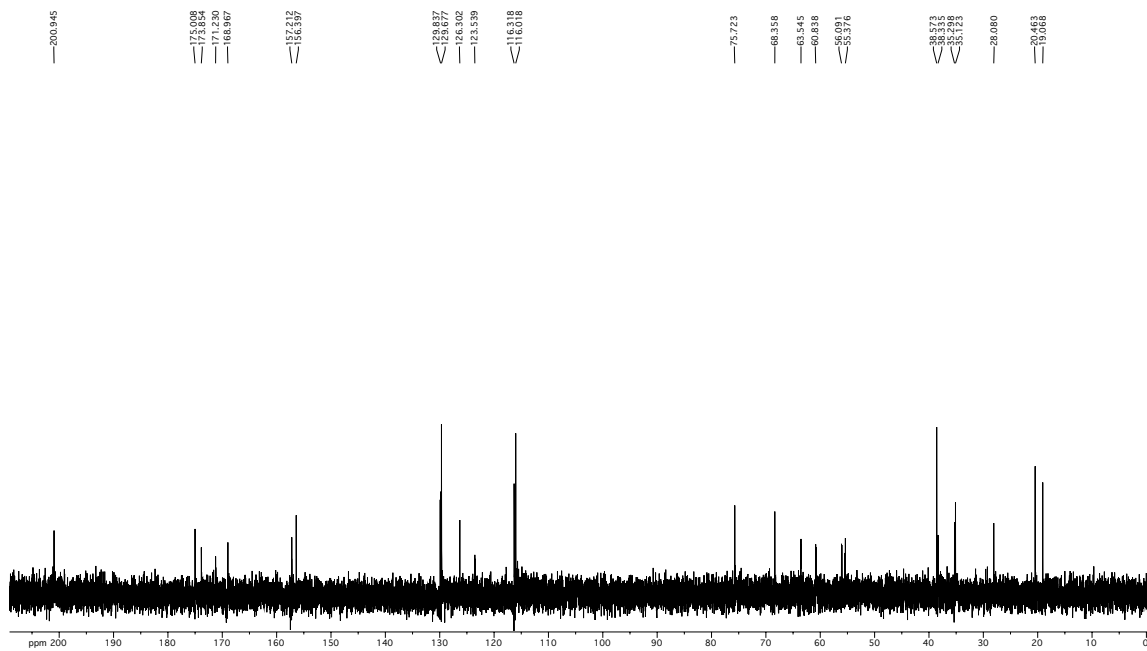

101 MHz <sup>13</sup>C-NMR Compound 12b – D<sub>2</sub>O

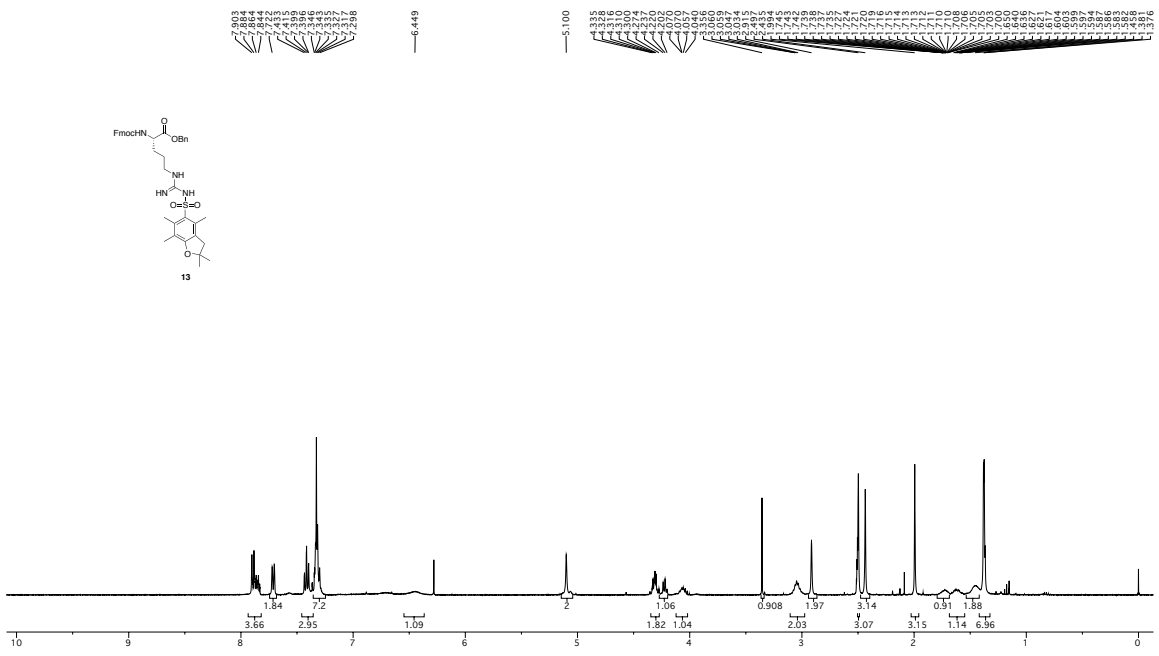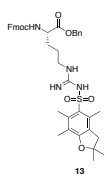

**400 MHz  $^1\text{H-NMR}$  Compound 13 –  $\text{d}_6\text{-DMSO}$  with TMS**

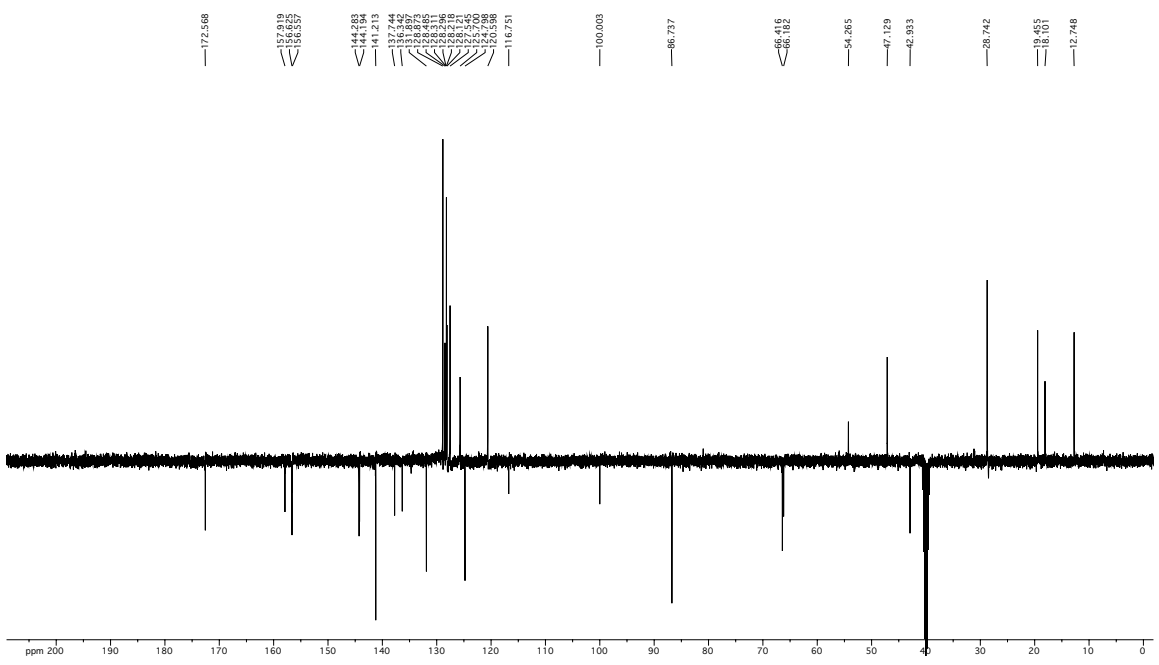

**101 MHz  $^{13}\text{C-NMR}$  Compound 13 –  $\text{d}_6\text{-DMSO}$  with TMS**

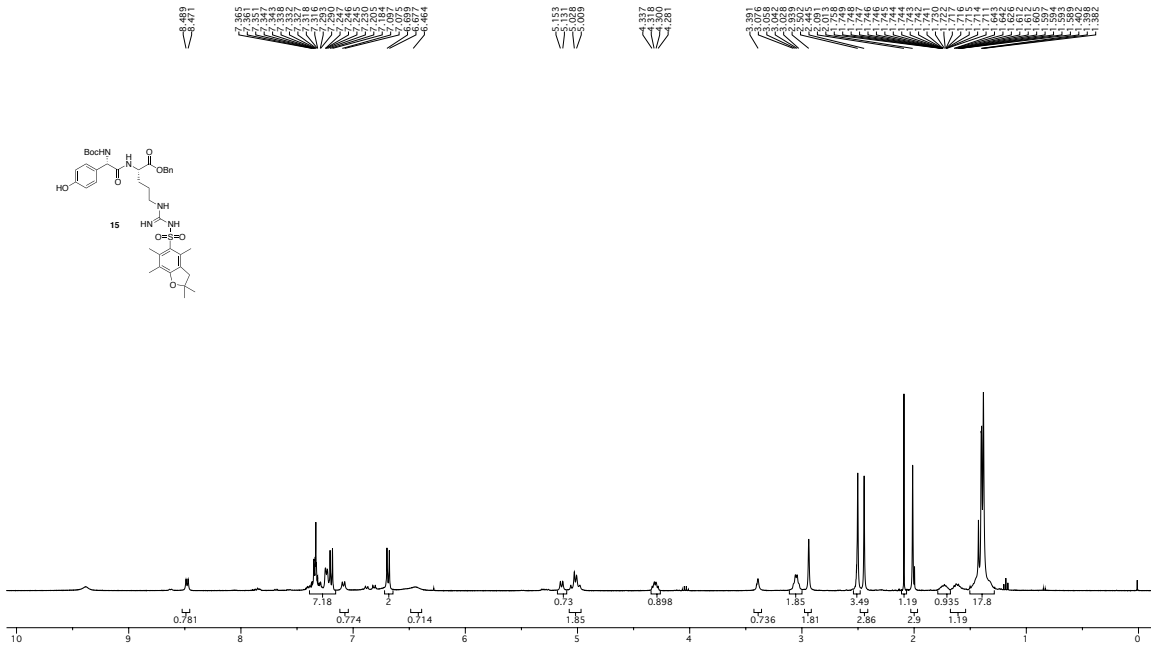

400 MHz <sup>1</sup>H-NMR Compound 15 – d<sub>6</sub>-DMSO with TMS

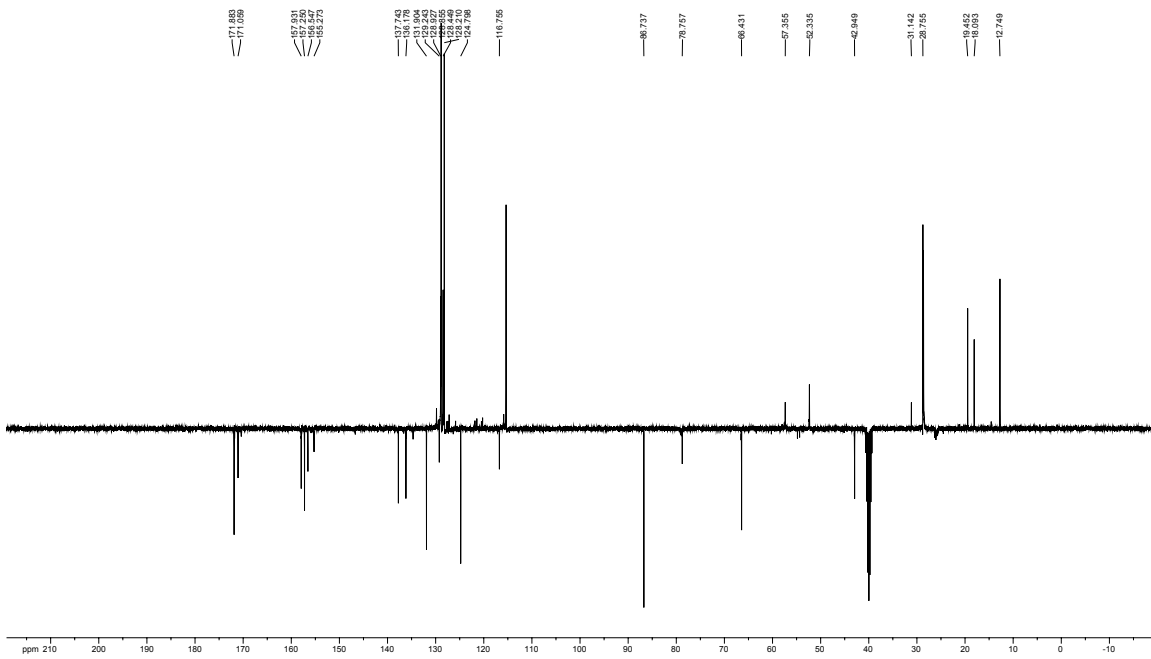

101 MHz <sup>13</sup>C-NMR Compound 15 – d<sub>6</sub>-DMSO with TMS

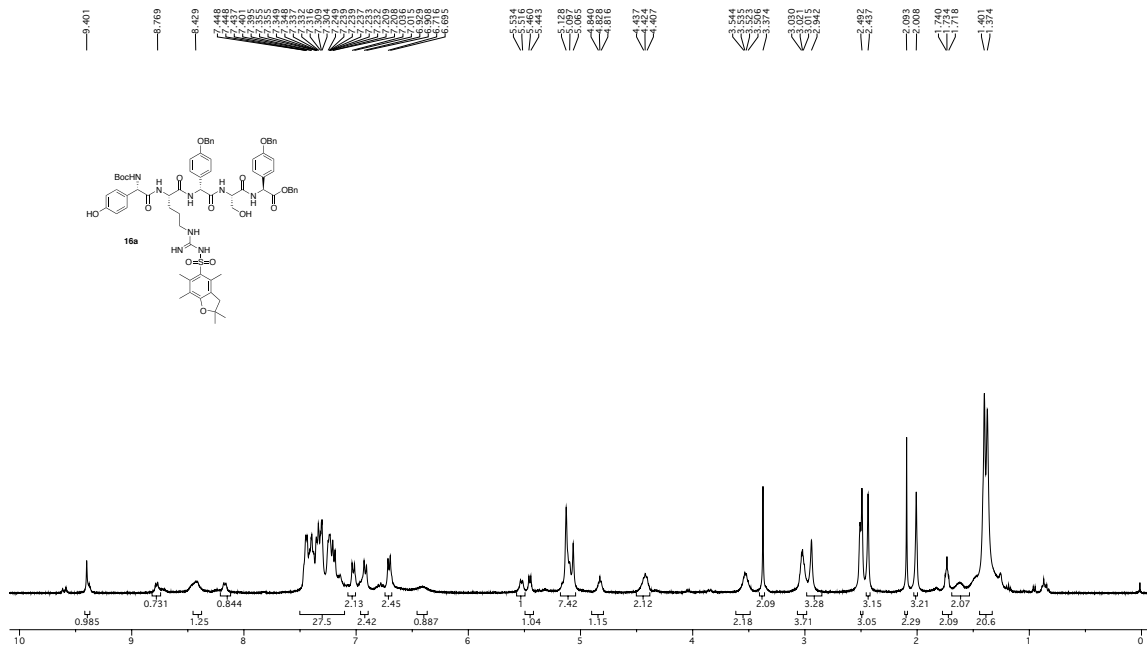

400 MHz <sup>1</sup>H-NMR Compound 16a – d<sub>6</sub>-DMSO with TMS

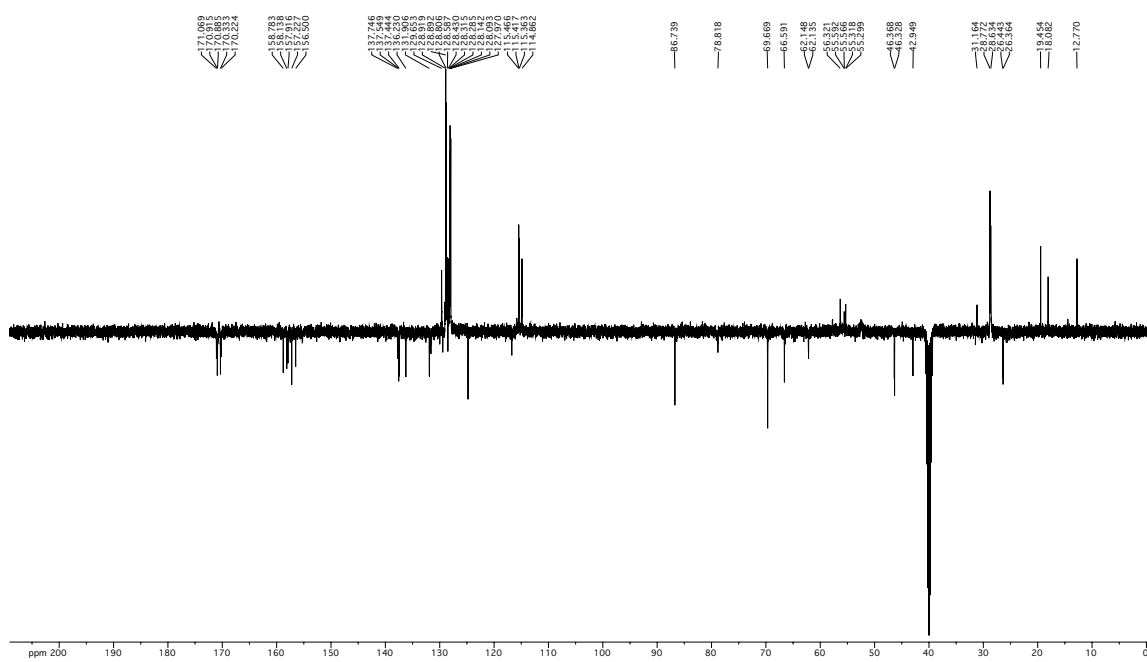

101 MHz <sup>13</sup>C-NMR Compound 16a – d<sub>6</sub>-DMSO with TMS

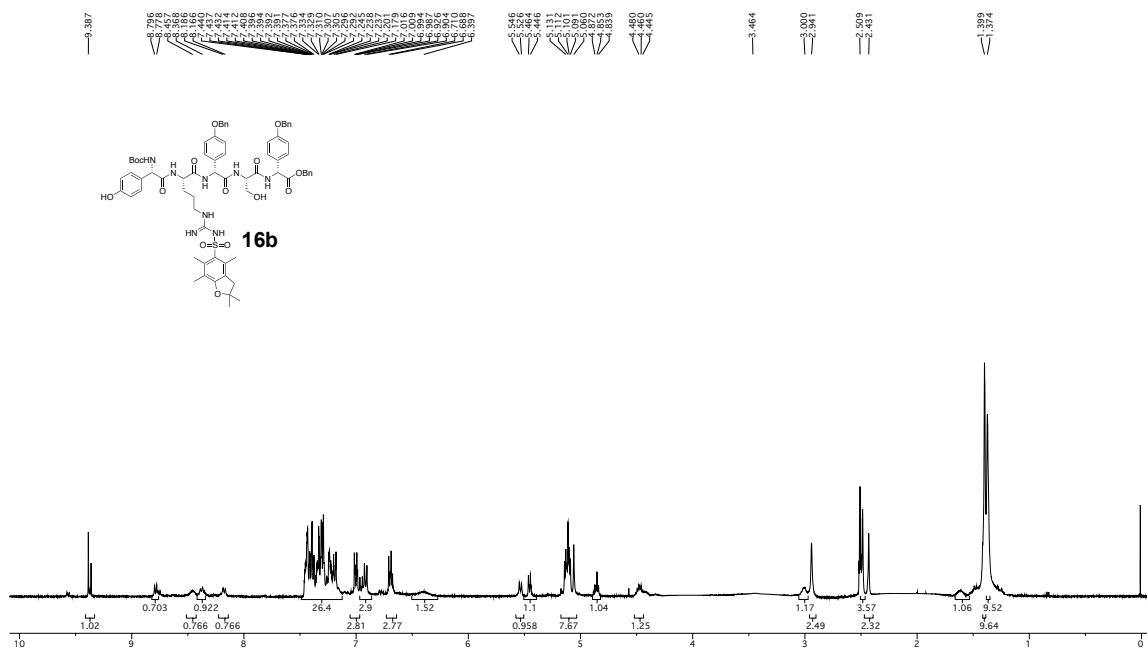

400 MHz <sup>1</sup>H-NMR Compound 16b – d<sub>6</sub>-DMSO with TMS

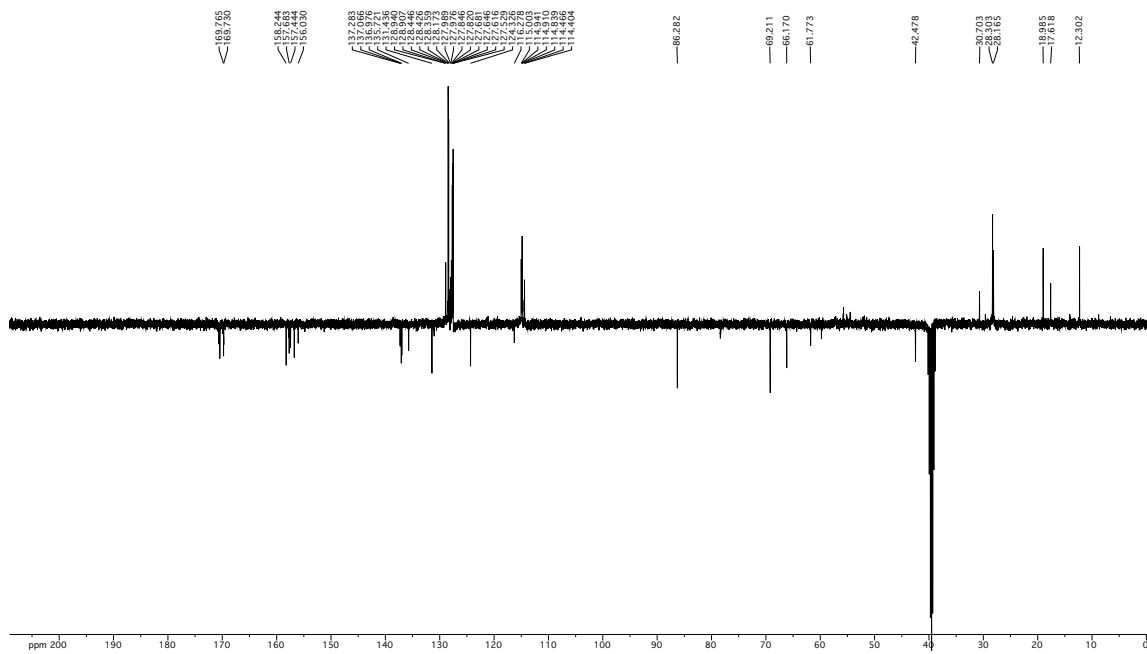

101 MHz <sup>13</sup>C-NMR Compound 16b – d<sub>6</sub>-DMSO with TMS





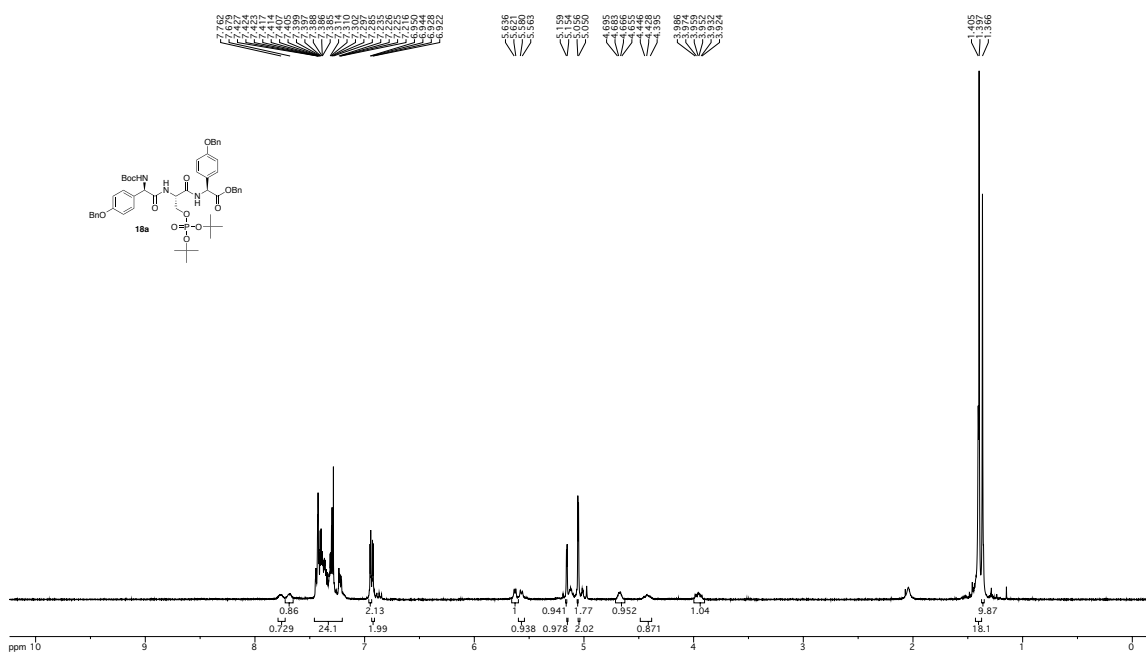

400 MHz  $^1\text{H-NMR}$  Compound 18a –  $\text{CDCl}_3$

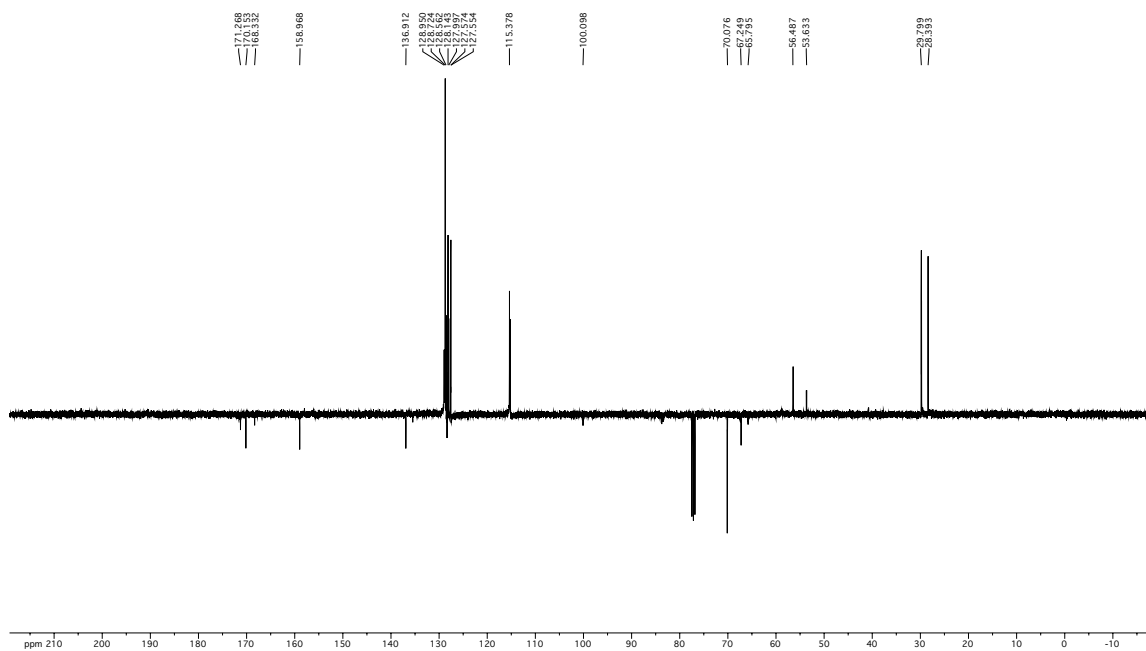

101 MHz  $^{13}\text{C-NMR}$  Compound 18a –  $\text{CDCl}_3$

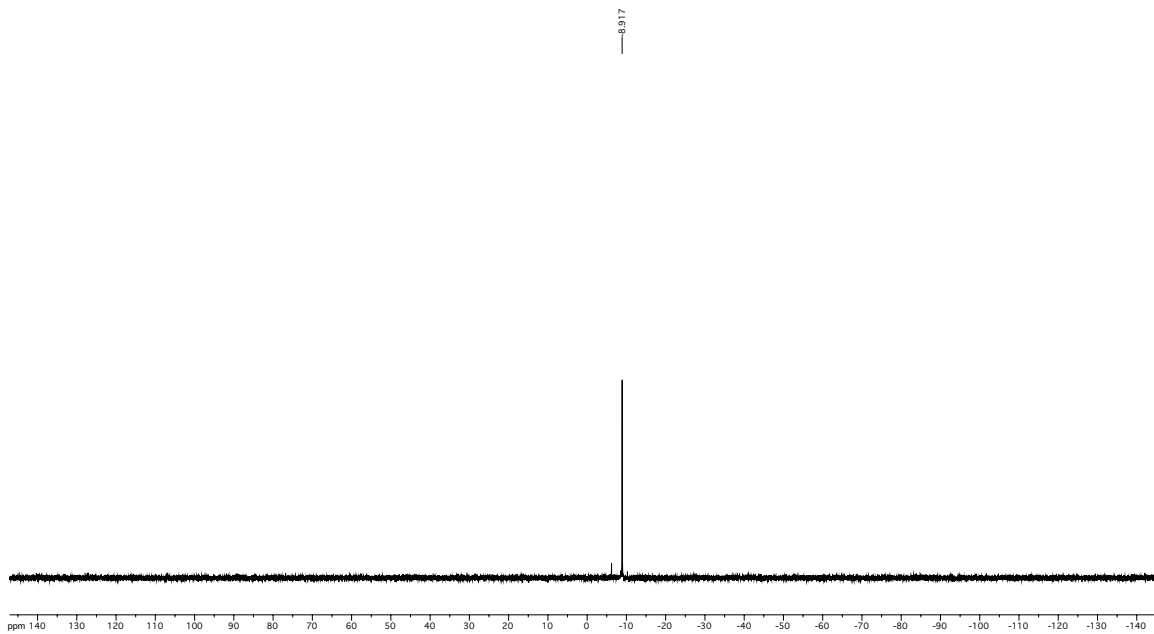

162 MHz  $^{31}\text{P}$ -NMR Compound 18a –  $\text{CDCl}_3$

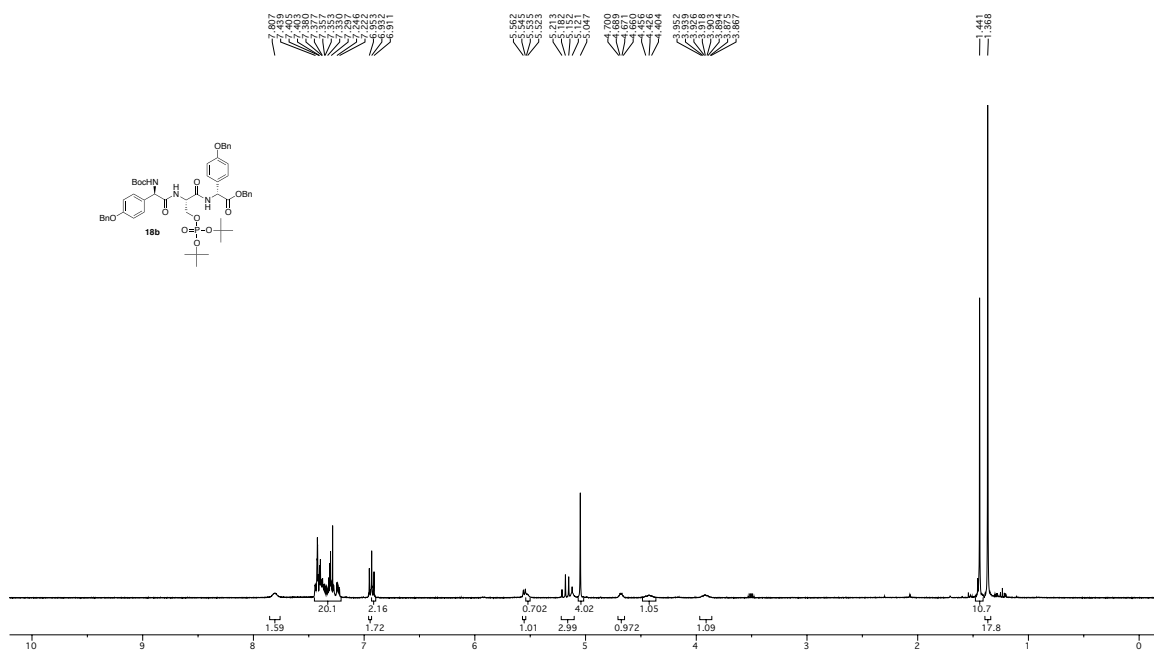

400 MHz  $^1\text{H}$ -NMR Compound 18b –  $\text{CDCl}_3$



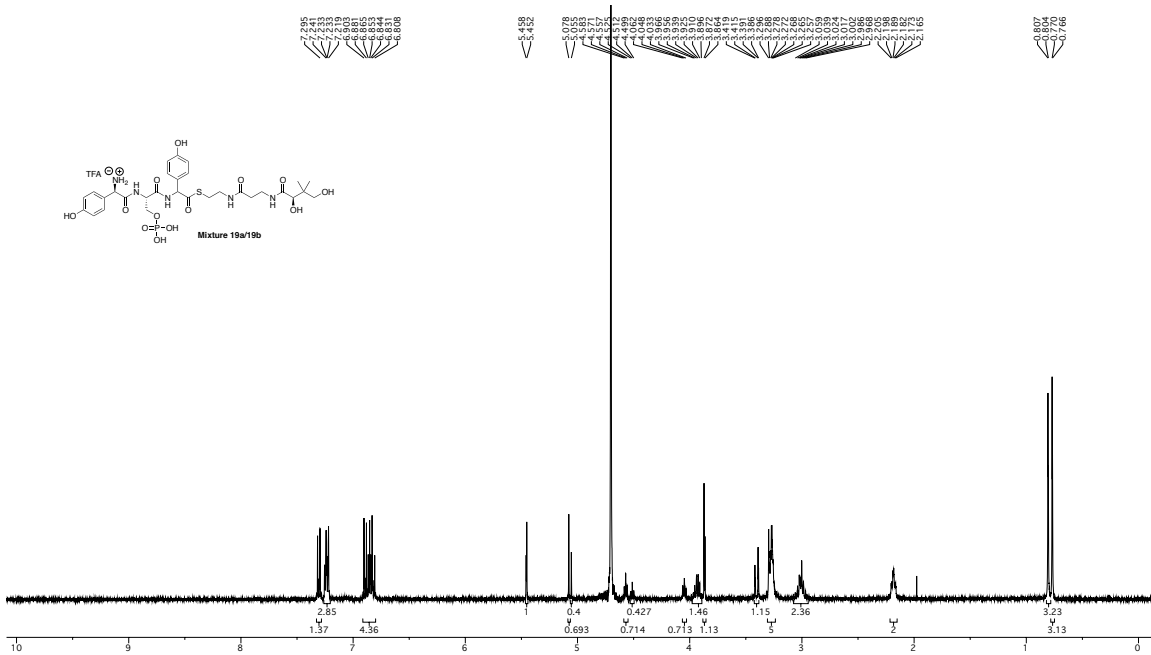

400 MHz  $^1\text{H}$ -NMR Compound 19a/b Mixture-  $\text{D}_2\text{O}$

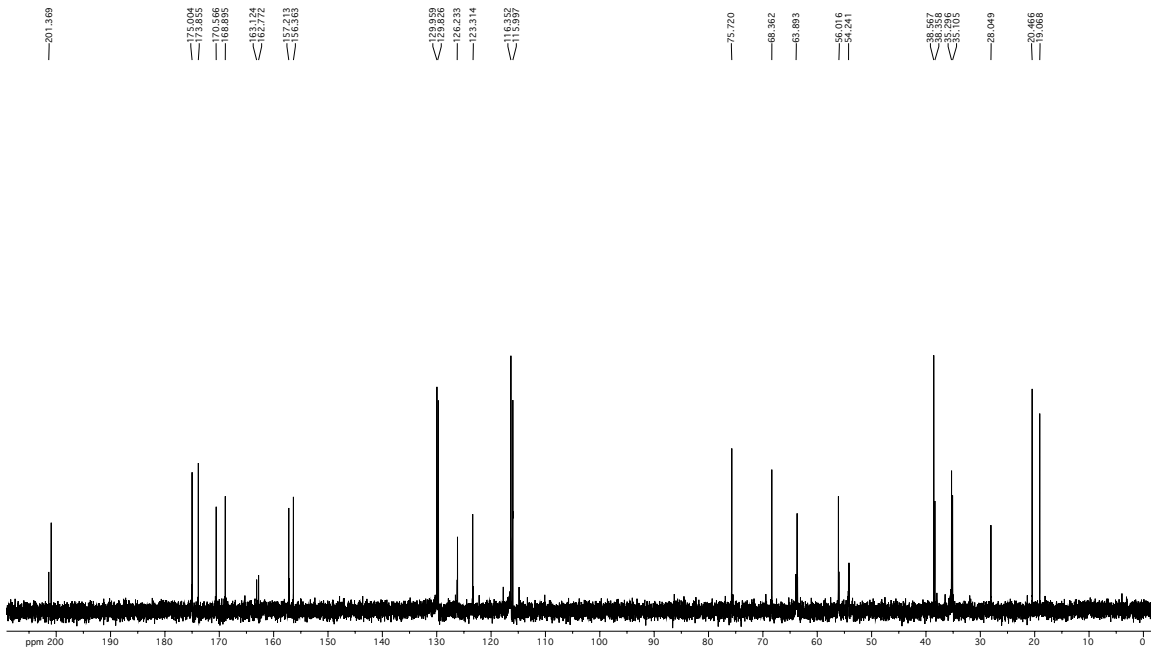

101 MHz  $^{13}\text{C}$ -NMR Compound 19a/b Mixture -  $\text{D}_2\text{O}$

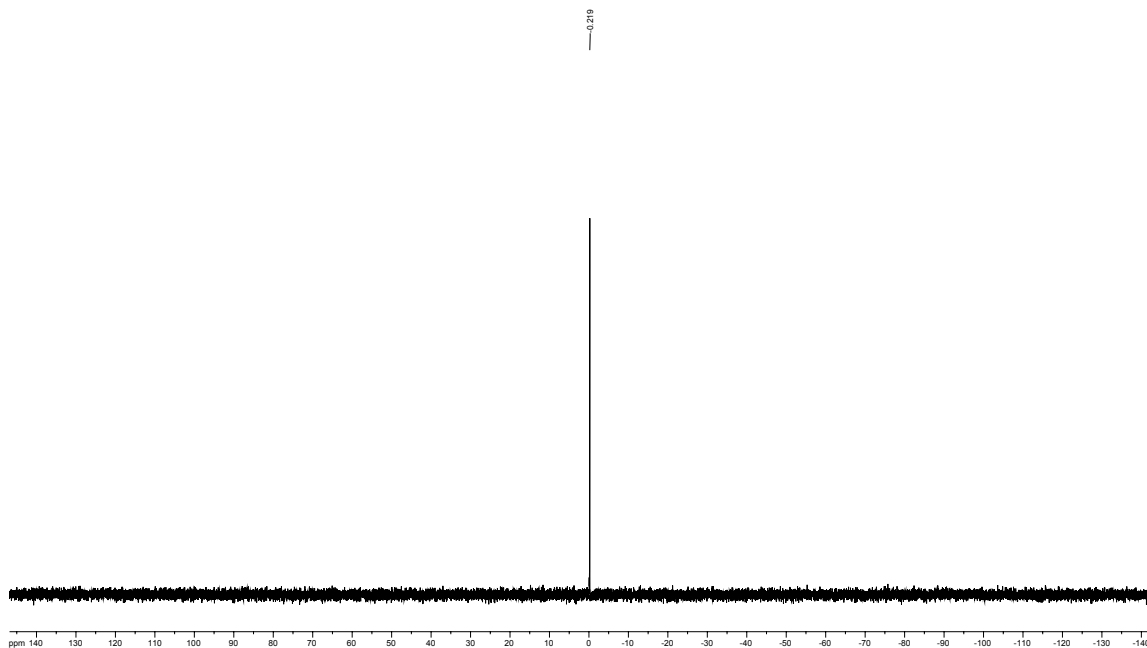

**162 MHz  $^{31}\text{P}$ -NMR Compound 19a/b Mixture –  $\text{D}_2\text{O}$**

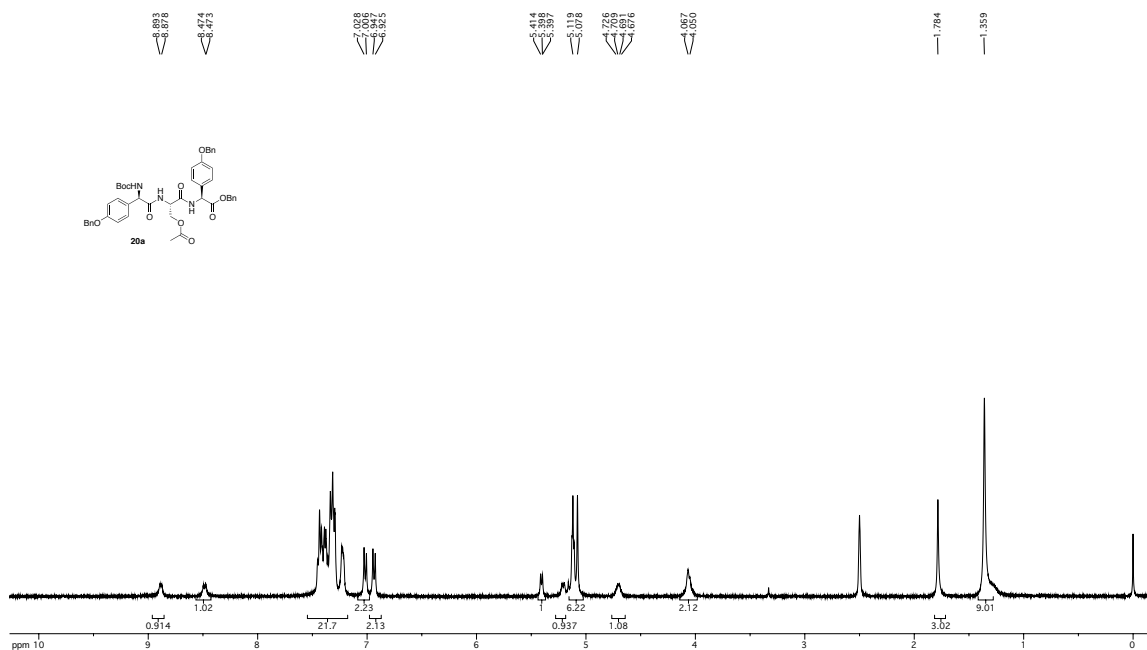

400 MHz <sup>1</sup>H-NMR Compound 20a – d<sub>6</sub>DMSO with TMS

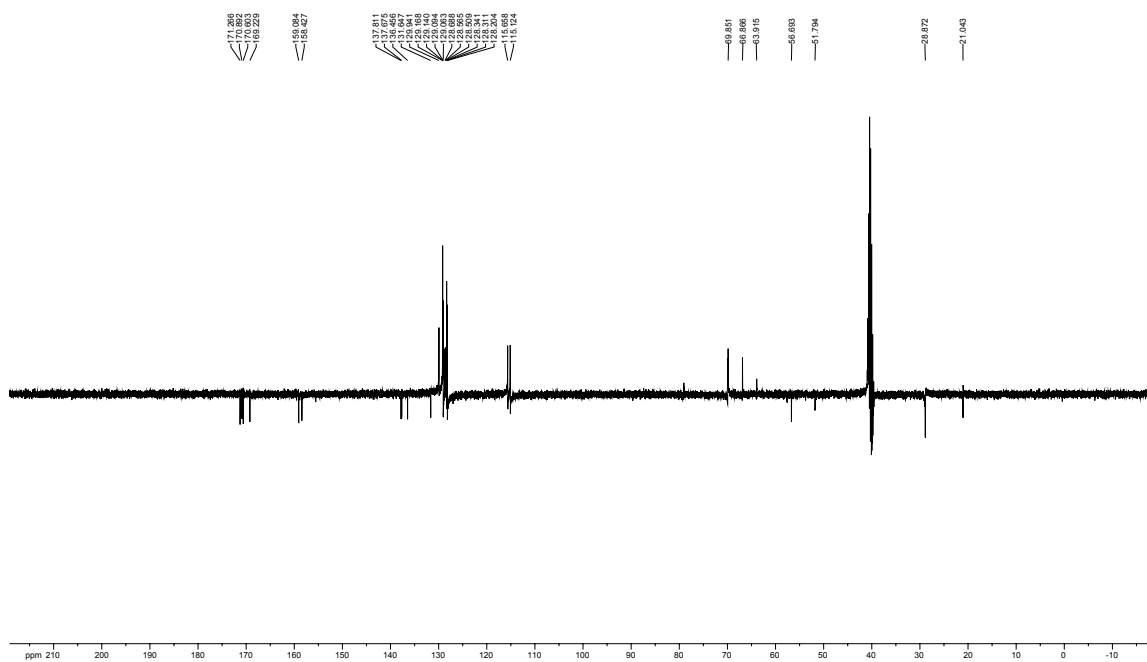

101 MHz <sup>13</sup>C-NMR Compound 20a – d<sub>6</sub>DMSO with TMS

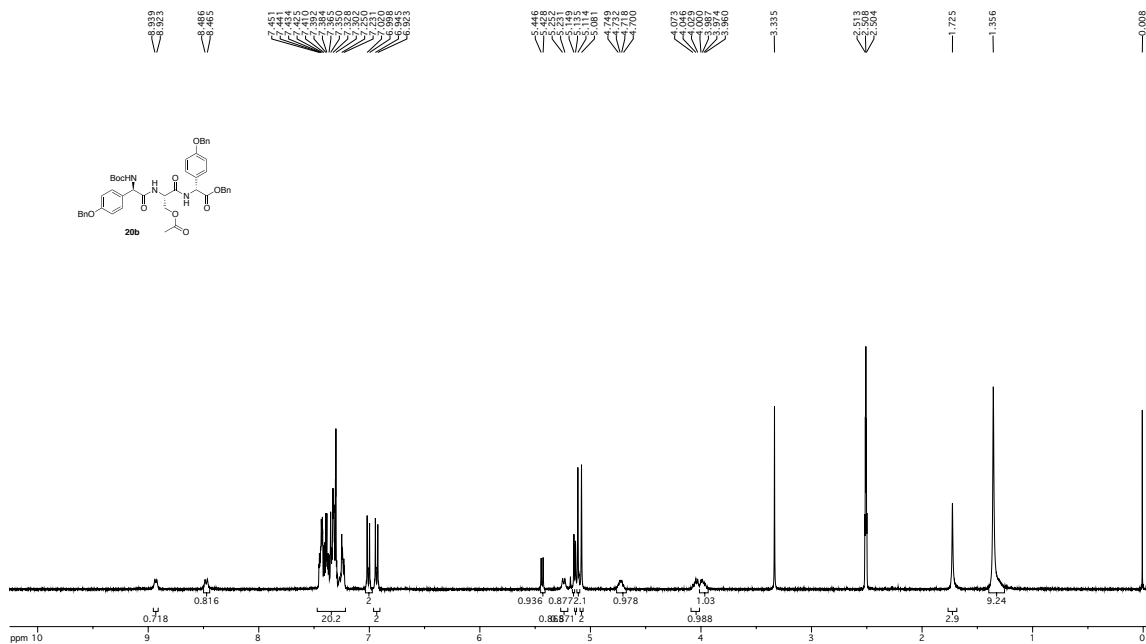

400 MHz <sup>1</sup>H-NMR Compound 20b – d<sub>6</sub>-DMSO with TMS

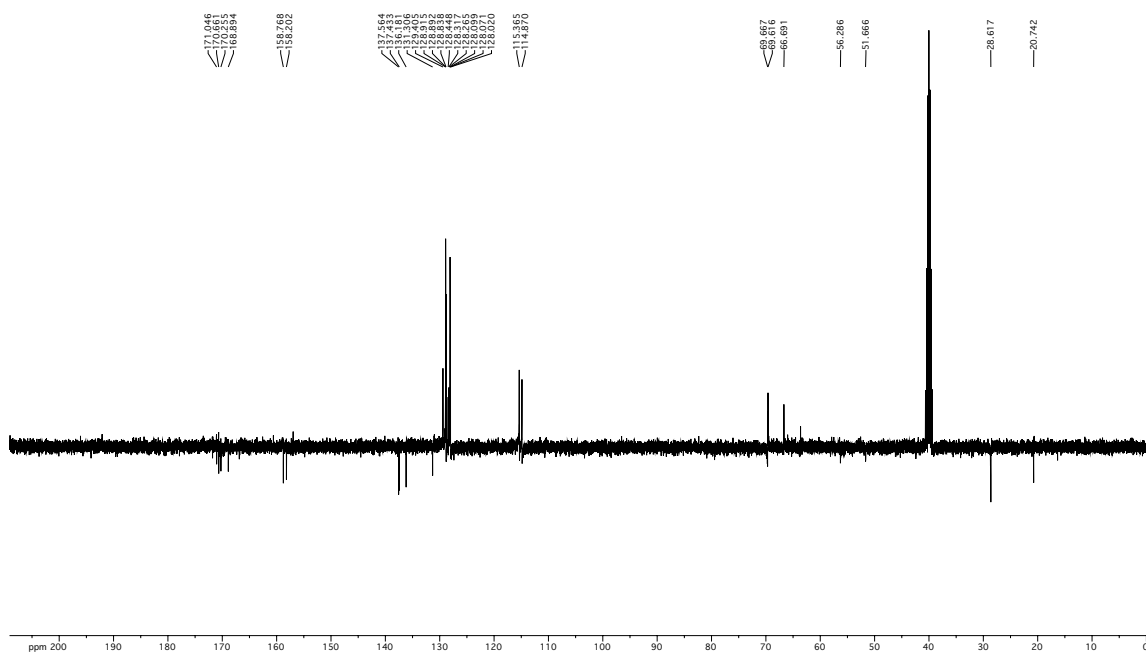

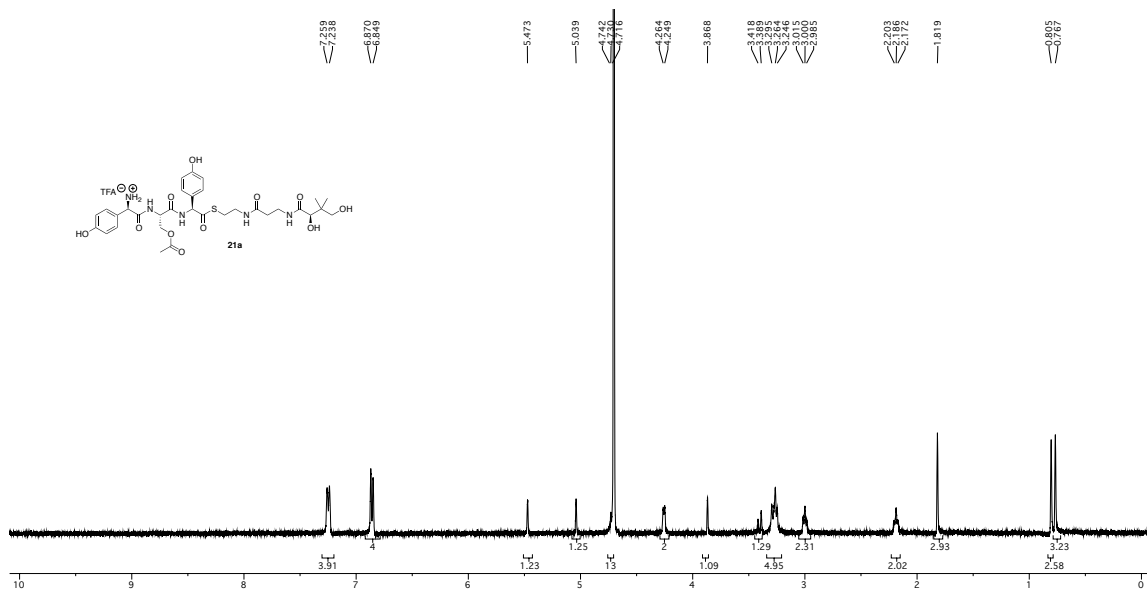

400 MHz <sup>1</sup>H-NMR Compound 21a – D<sub>2</sub>O

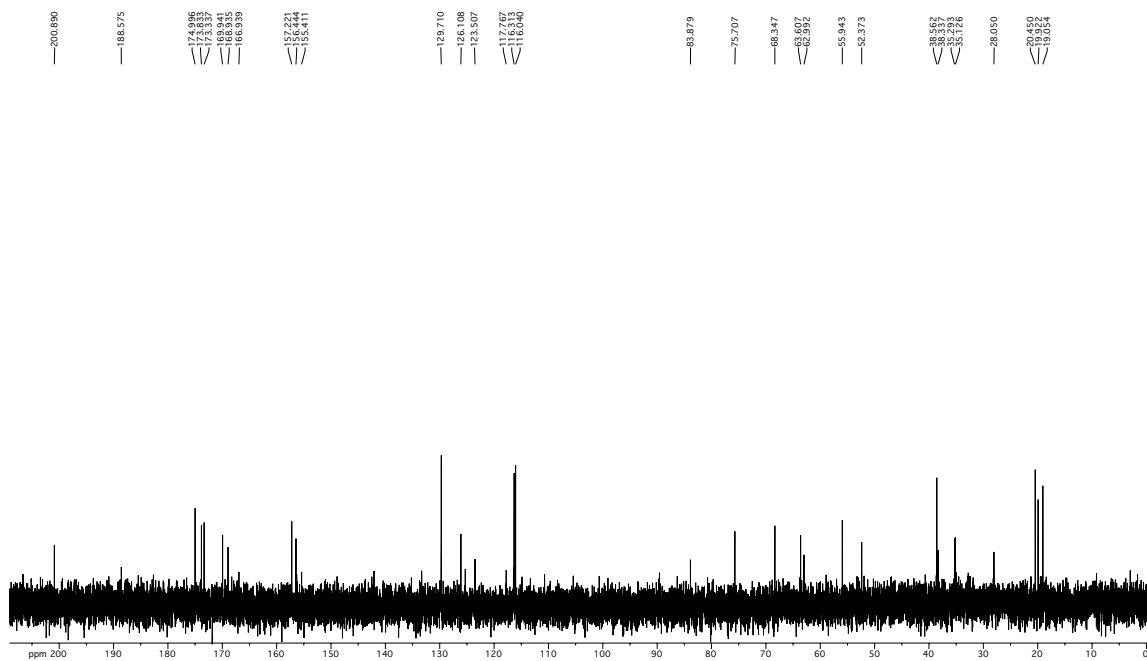

101 MHz <sup>13</sup>C-NMR Compound 21a – D<sub>2</sub>O



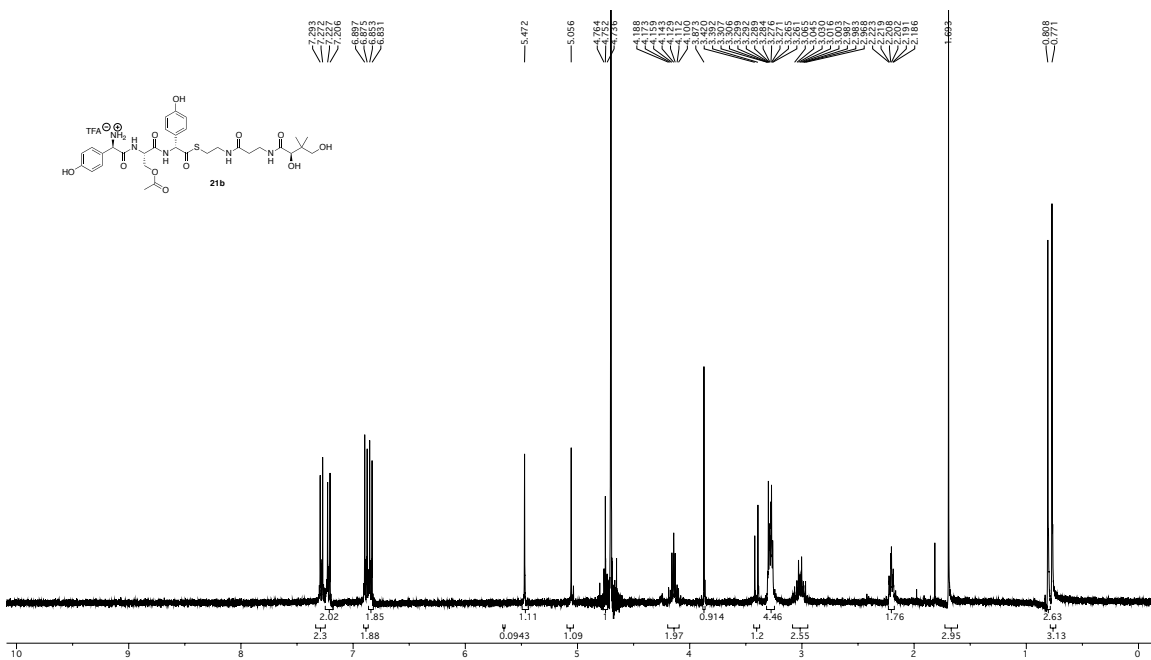

400 MHz <sup>1</sup>H-NMR Compound 21b – D<sub>2</sub>O

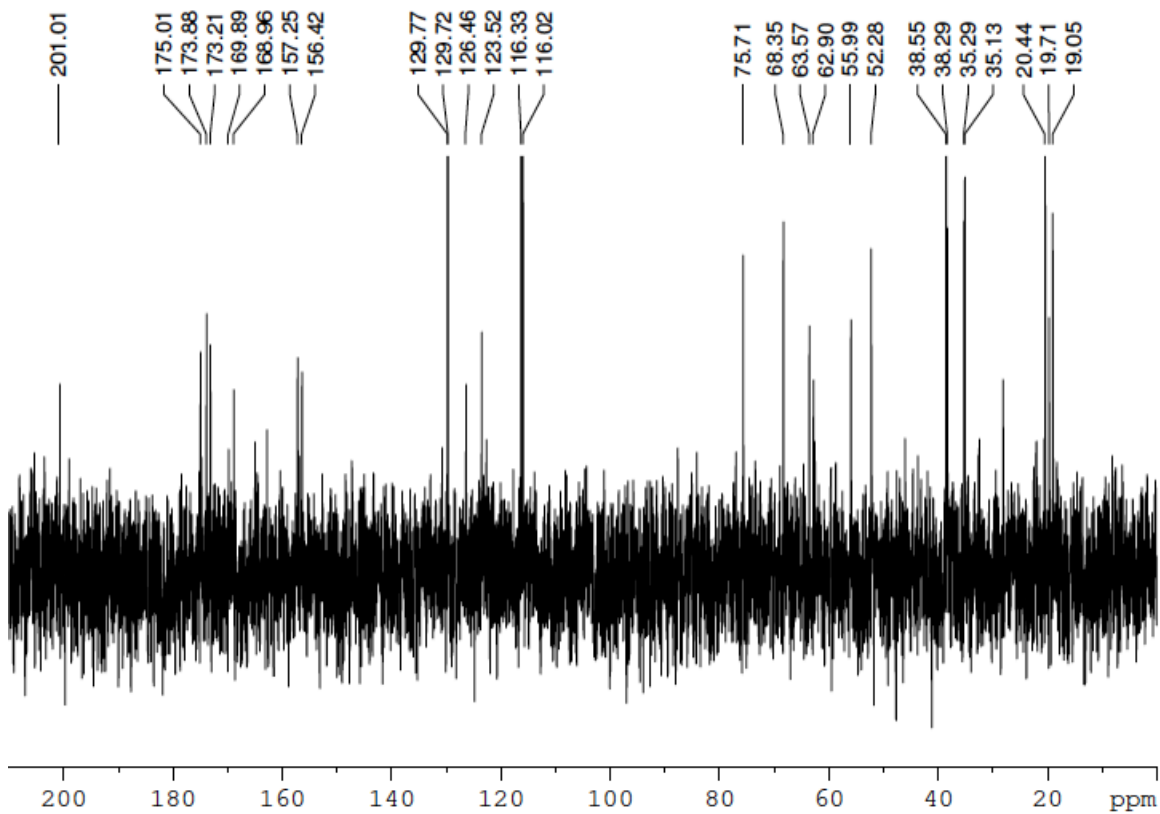

101 MHz <sup>13</sup>C-NMR Compound 21b – D<sub>2</sub>O

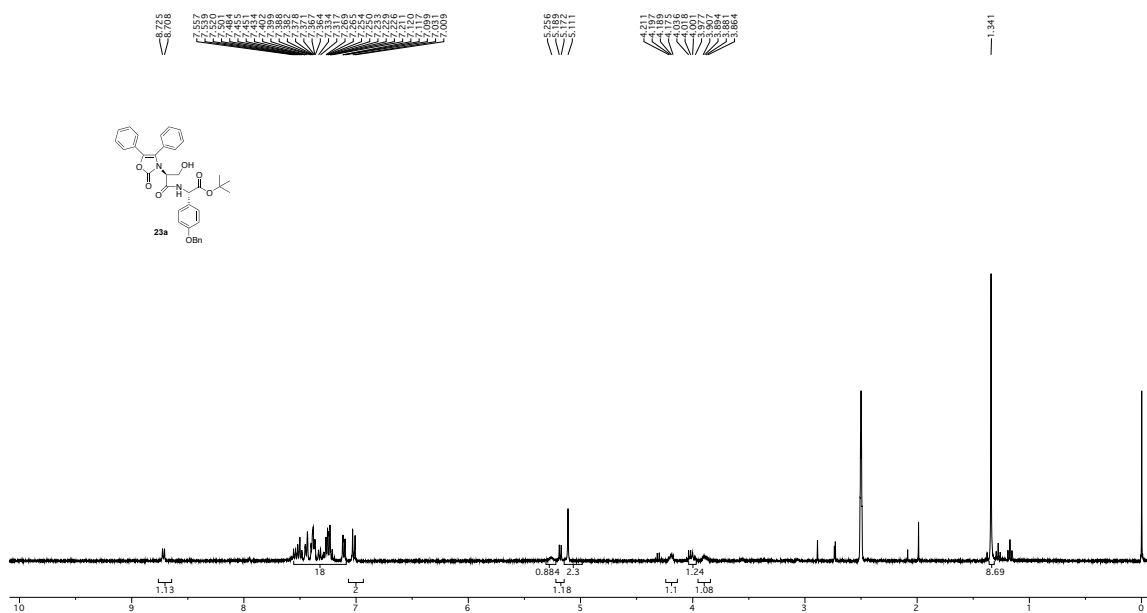

400 MHz <sup>1</sup>H-NMR Compound 23a – d<sub>6</sub>-DMSO with TMS



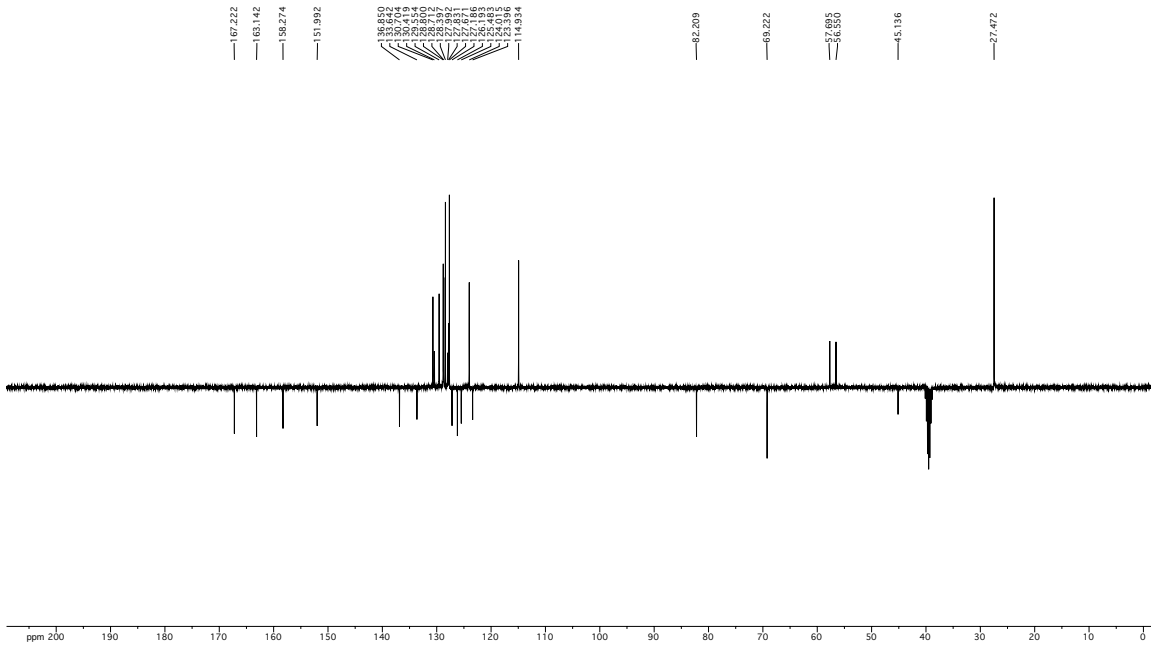

101 MHz  $^{13}\text{C}$ -NMR Compound 24a –  $\text{d}_6$ -DMSO with TMS

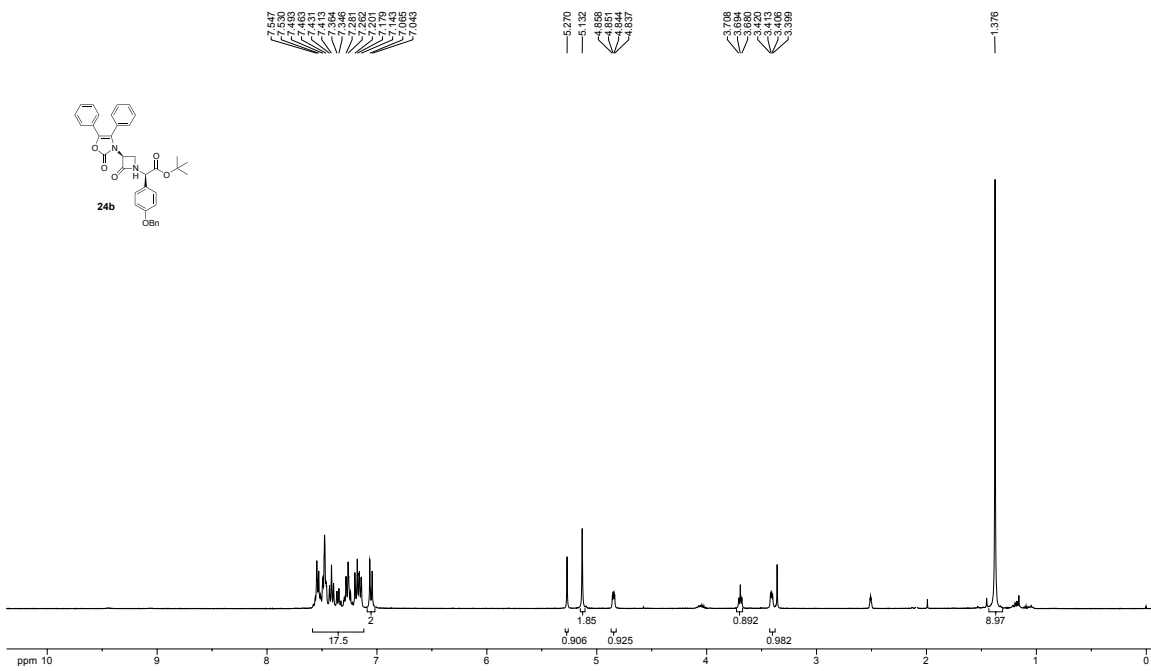

400 MHz  $^1\text{H}$ -NMR Compound 24b –  $\text{d}_6$ -DMSO with TMS

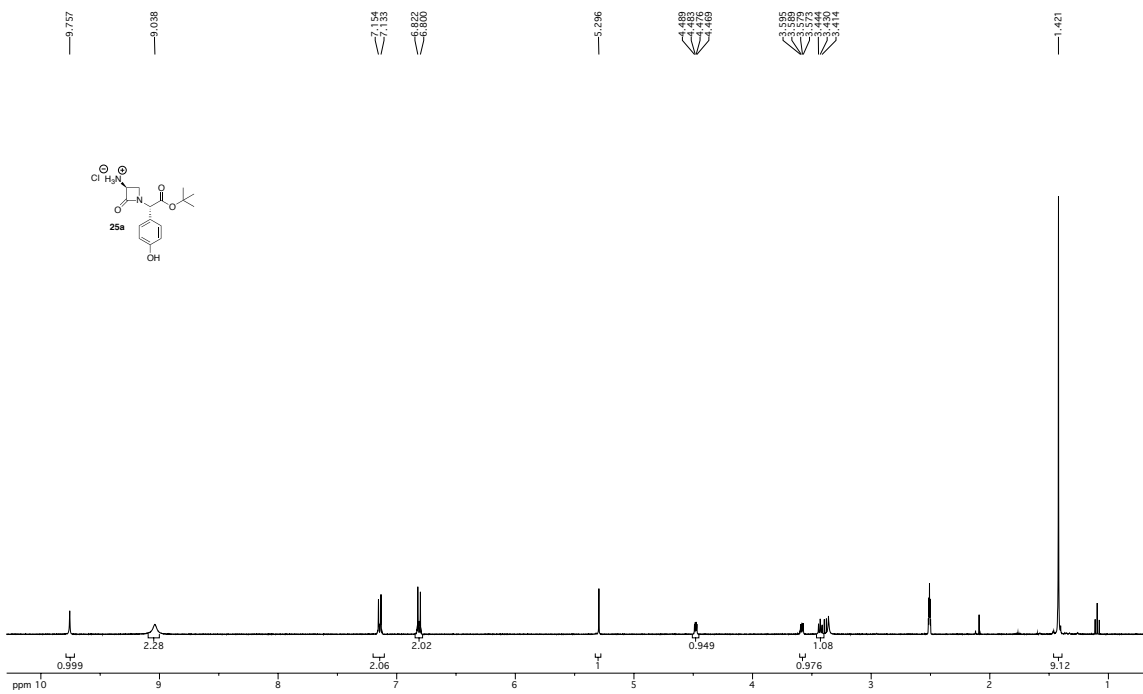

400 MHz <sup>1</sup>H-NMR Compound 25a – d<sub>6</sub>-DMSO with TMS

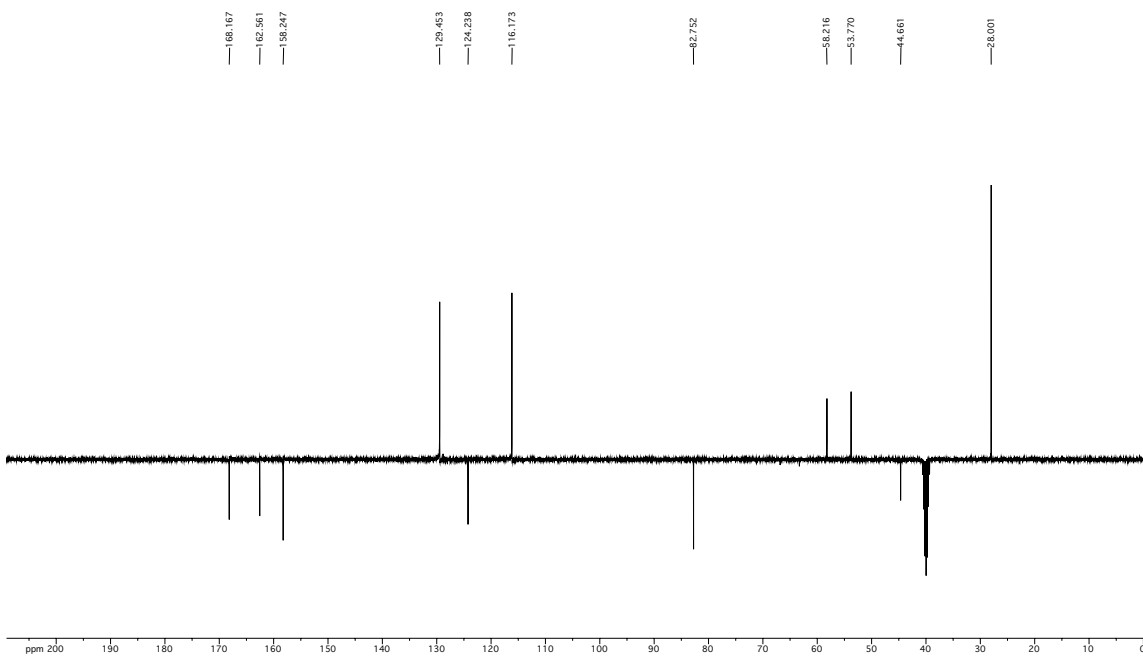

101 MHz <sup>13</sup>C-NMR Compound 25a – d<sub>6</sub>-DMSO with TMS

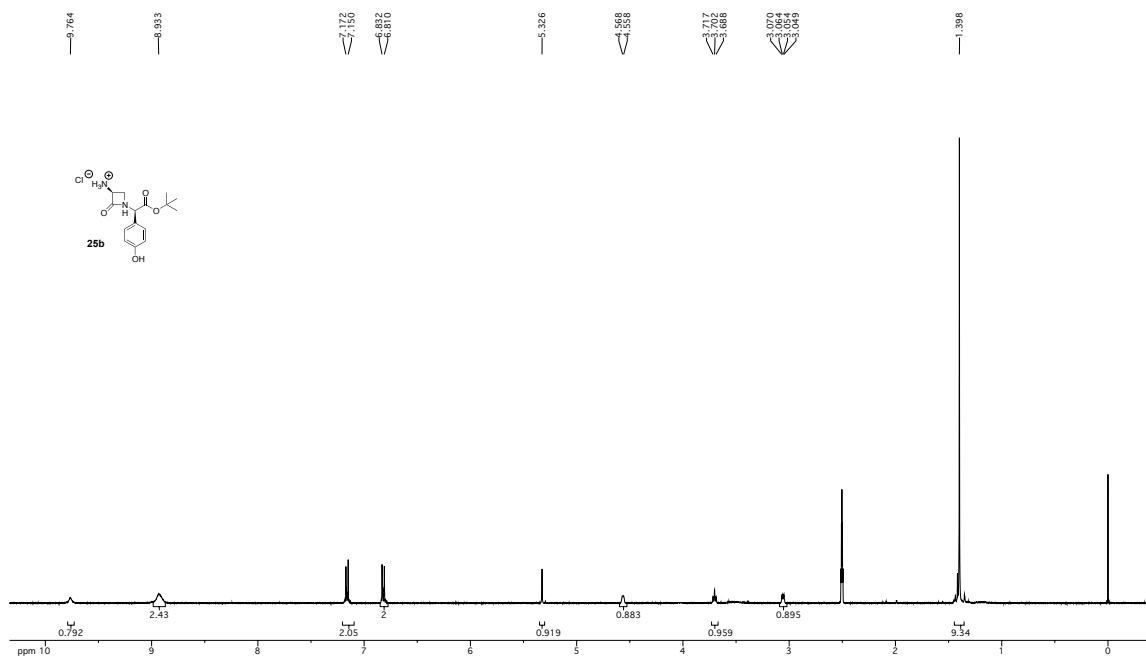

**400 MHz <sup>1</sup>H-NMR Compound 25b – d<sub>6</sub>-DMSO with TMS**

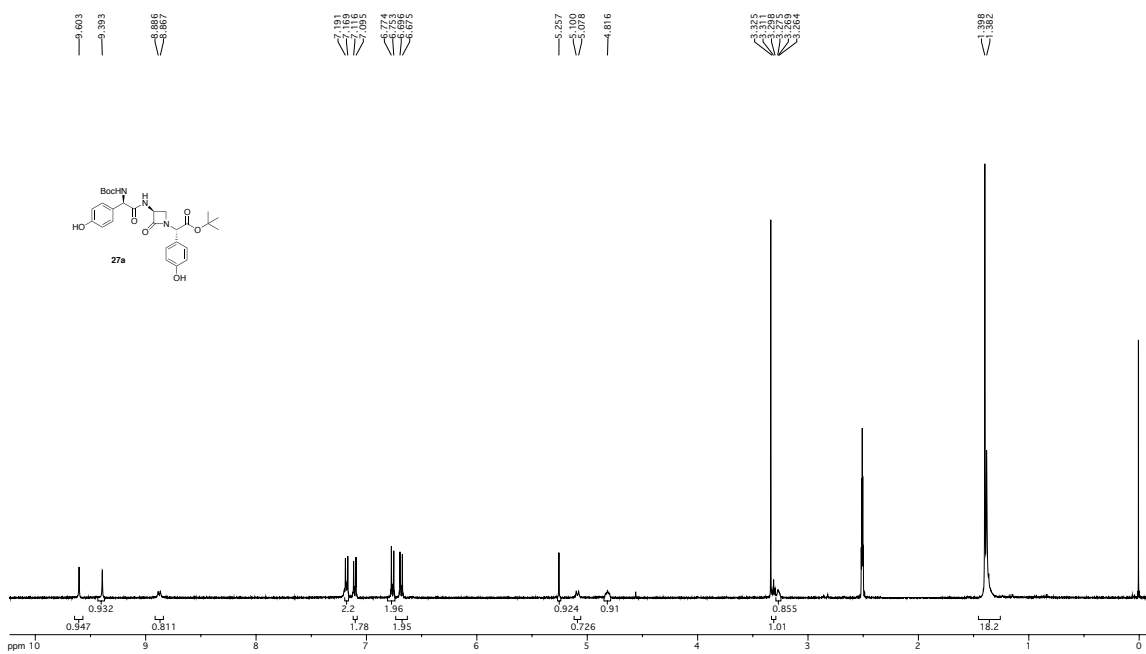

**400 MHz <sup>1</sup>H-NMR Compound 27a – d<sub>6</sub>-DMSO with TMS**

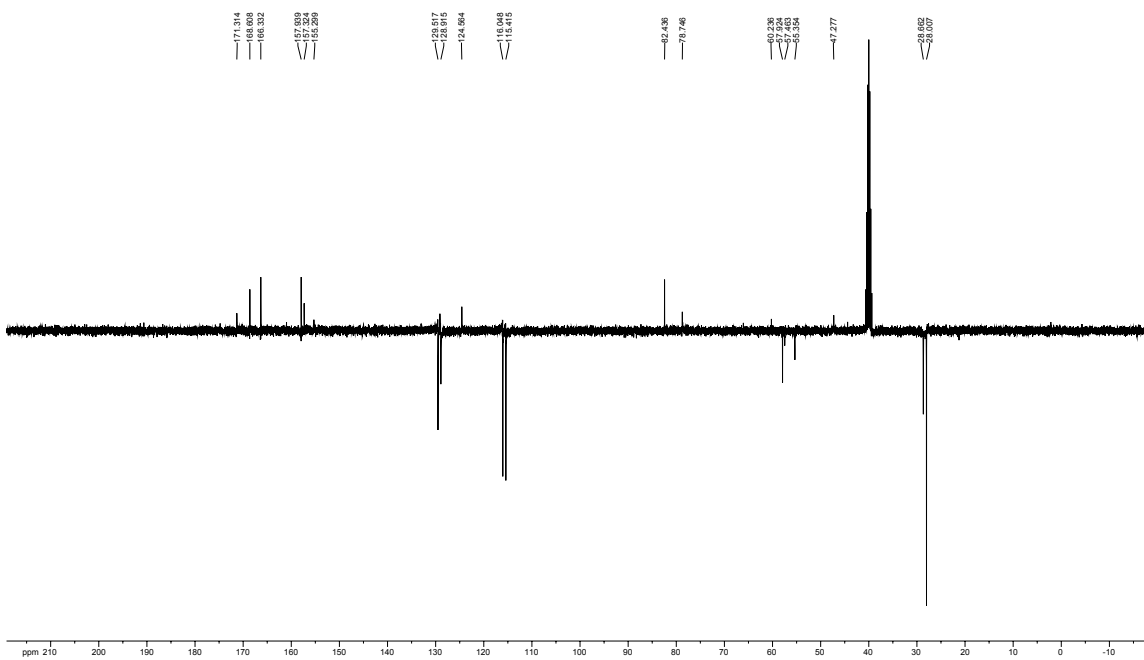

101 MHz <sup>13</sup>C-NMR Compound 27a – d<sub>6</sub>-DMSO with TMS

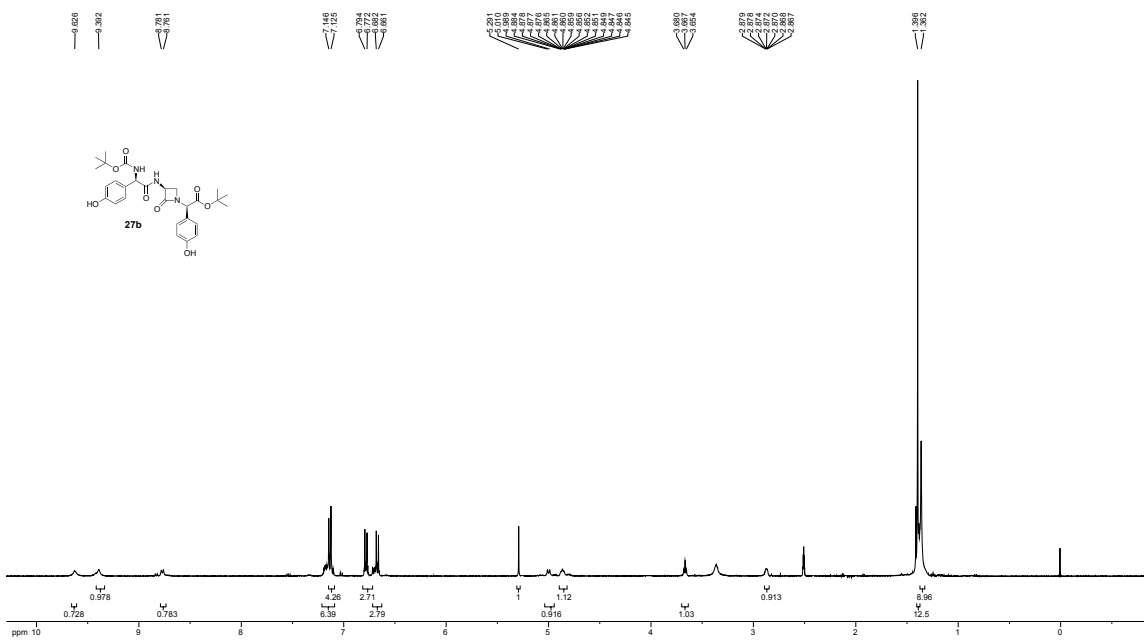

400 MHz <sup>1</sup>H-NMR Compound 27b – d<sub>6</sub>-DMSO with TMS

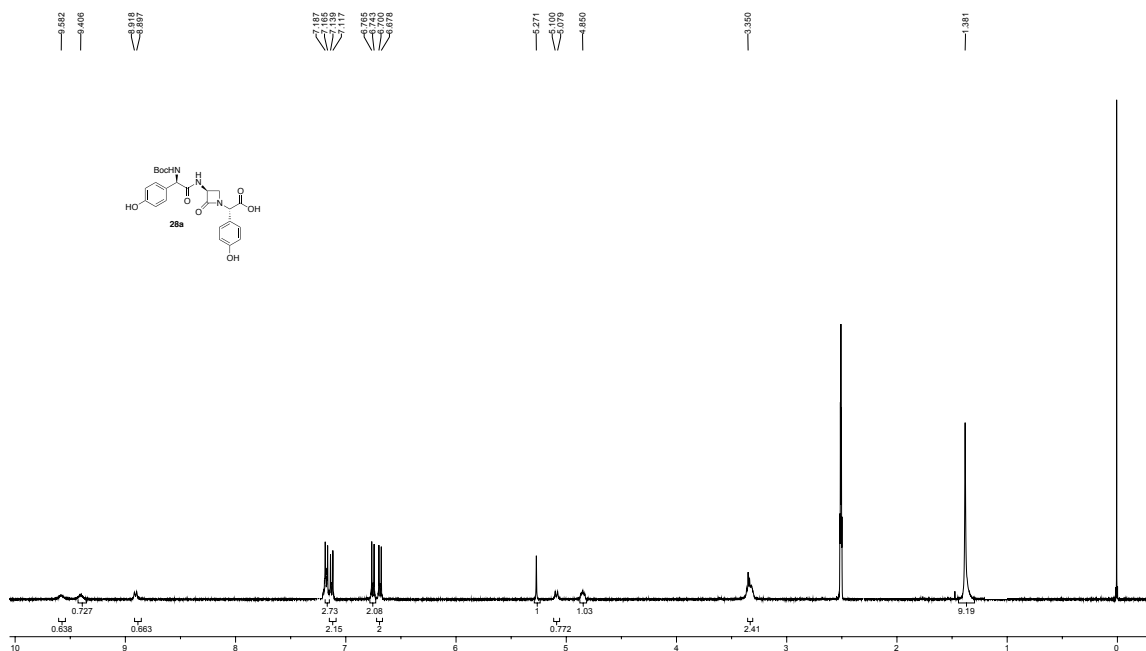

400 MHz <sup>1</sup>H-NMR Compound 28a – d<sub>6</sub>-DMSO with TMS

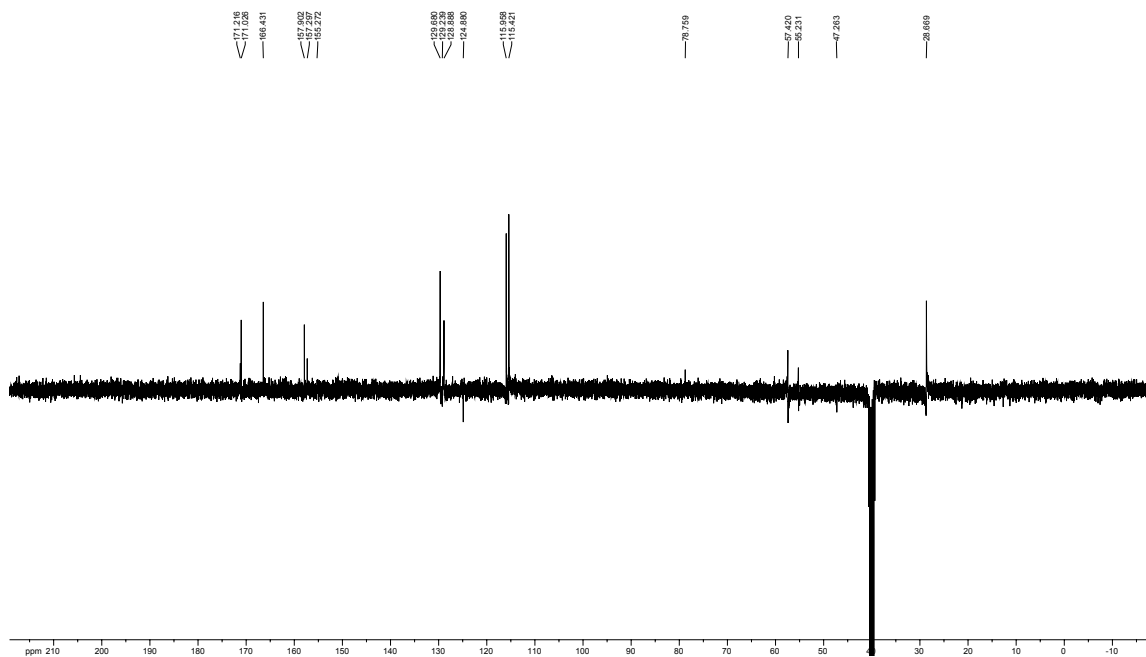

101 MHz <sup>13</sup>C-NMR Compound 28a – d<sub>6</sub>-DMSO with TMS



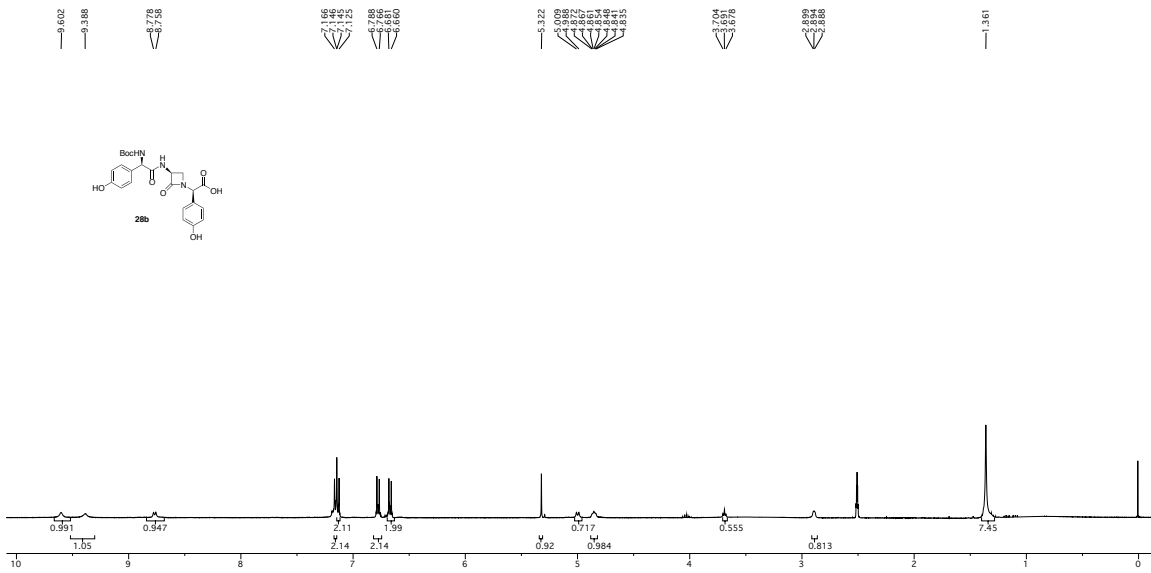

400 MHz <sup>1</sup>H-NMR Compound 28b – d<sub>6</sub>-DMSO with TMS

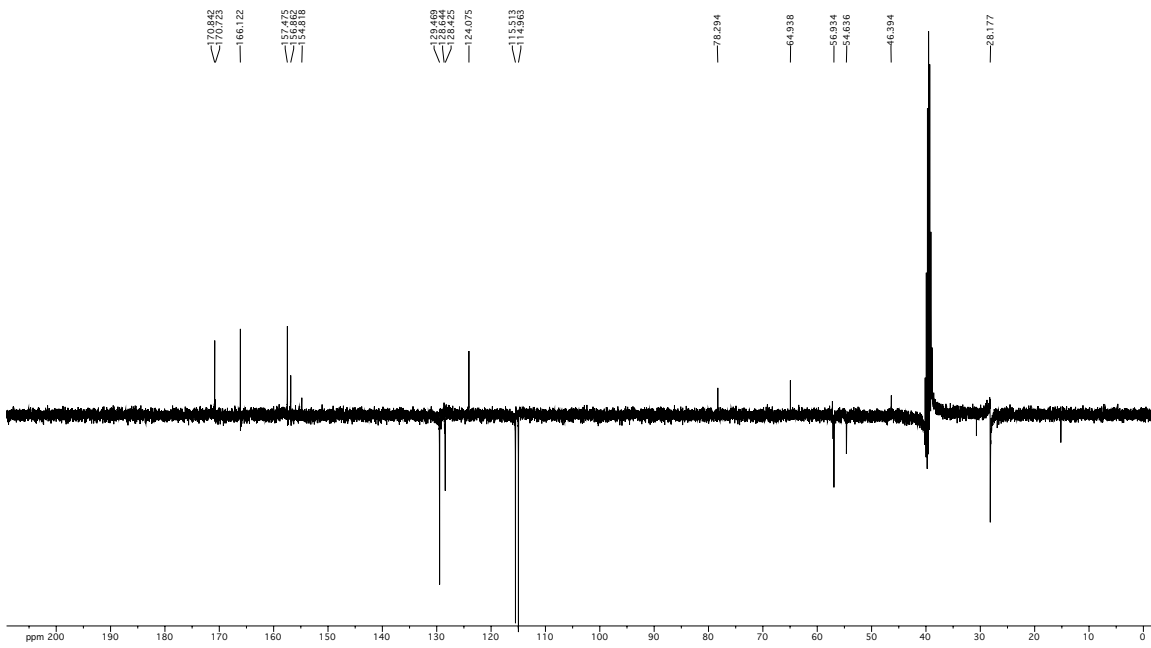

101 MHz <sup>13</sup>C-NMR Compound 28b – d<sub>6</sub>-DMSO with TMS



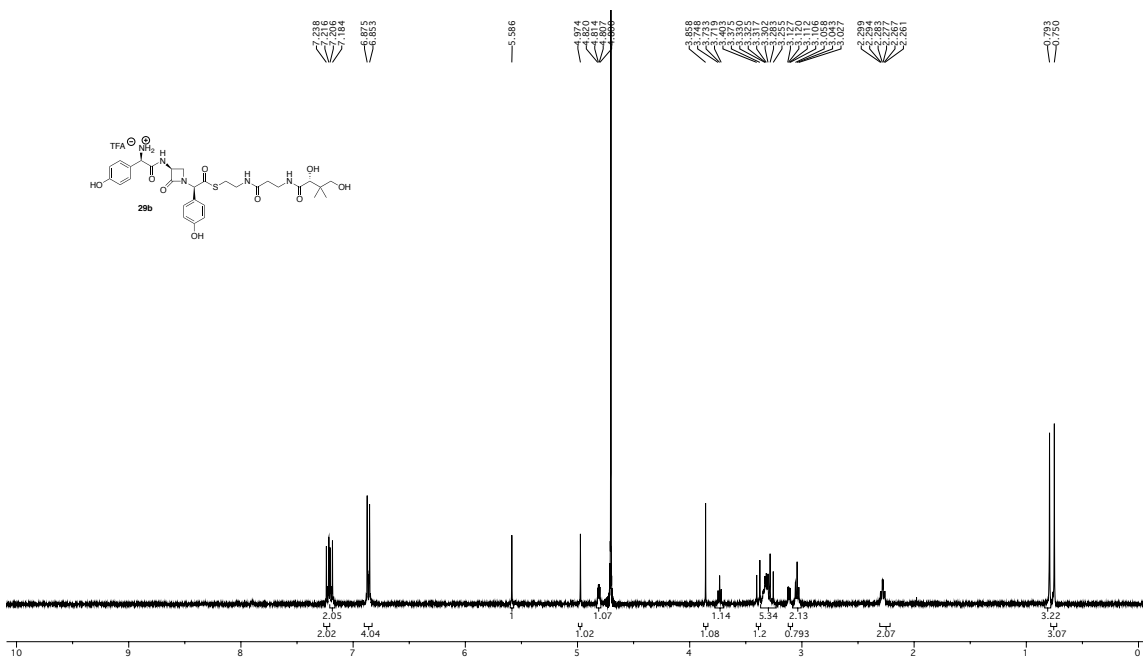

400 MHz <sup>1</sup>H-NMR Compound 29b – D<sub>2</sub>O

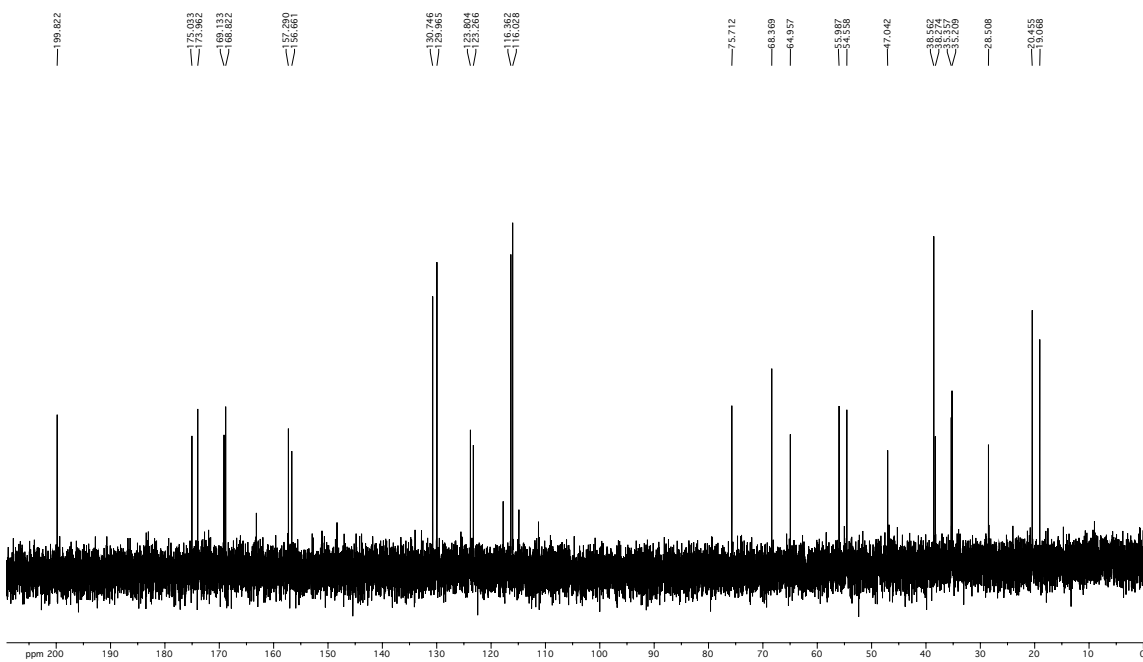

101 MHz <sup>13</sup>C-NMR Compound 29b – D<sub>2</sub>O

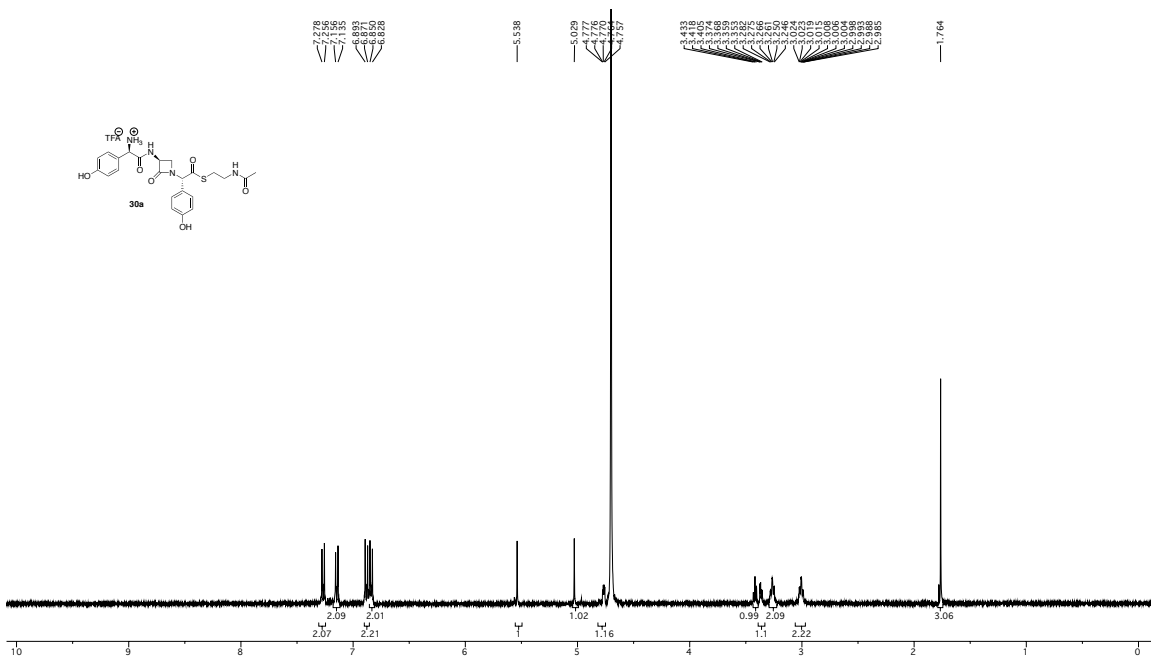

400 MHz <sup>1</sup>H-NMR Compound 30a – D<sub>2</sub>O

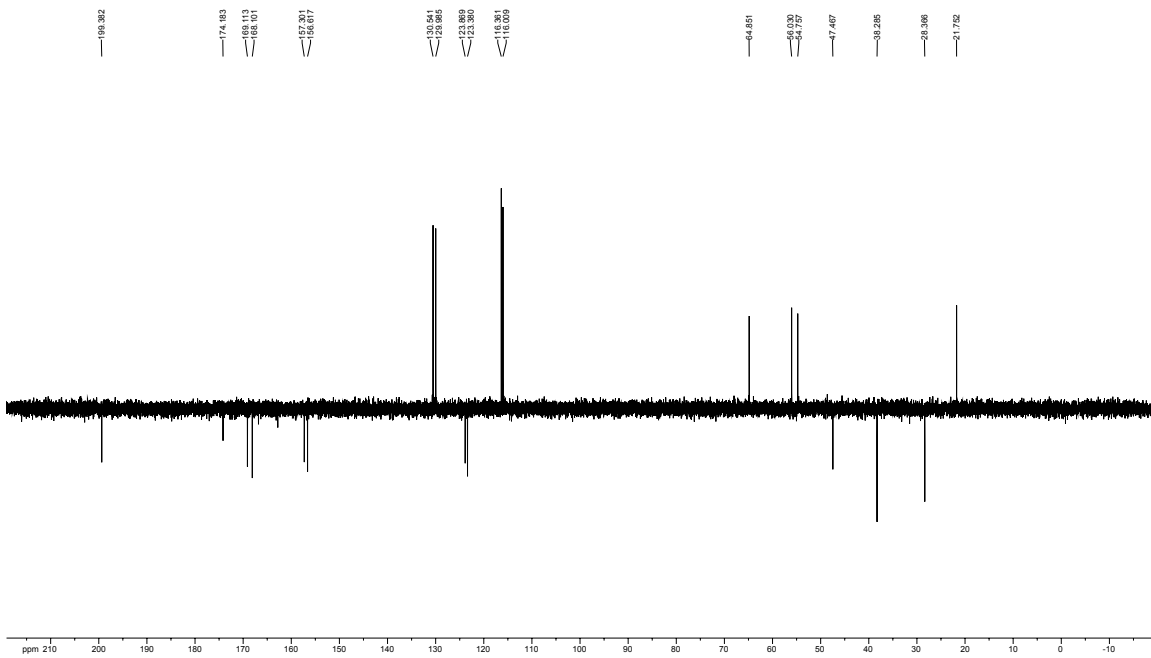

101 MHz <sup>13</sup>C-NMR Compound 30a – D<sub>2</sub>O

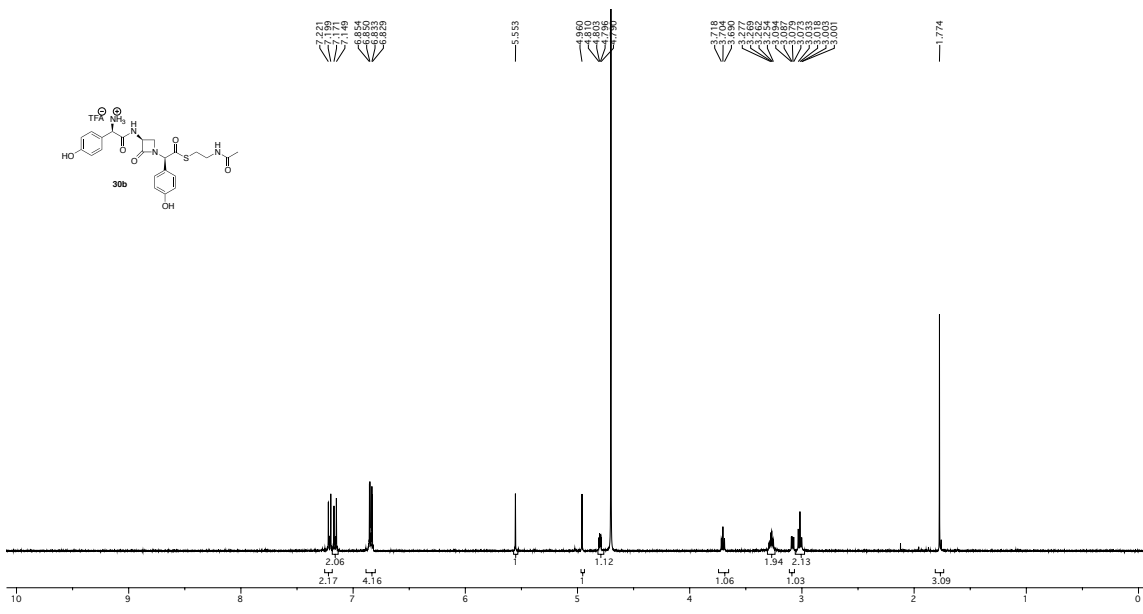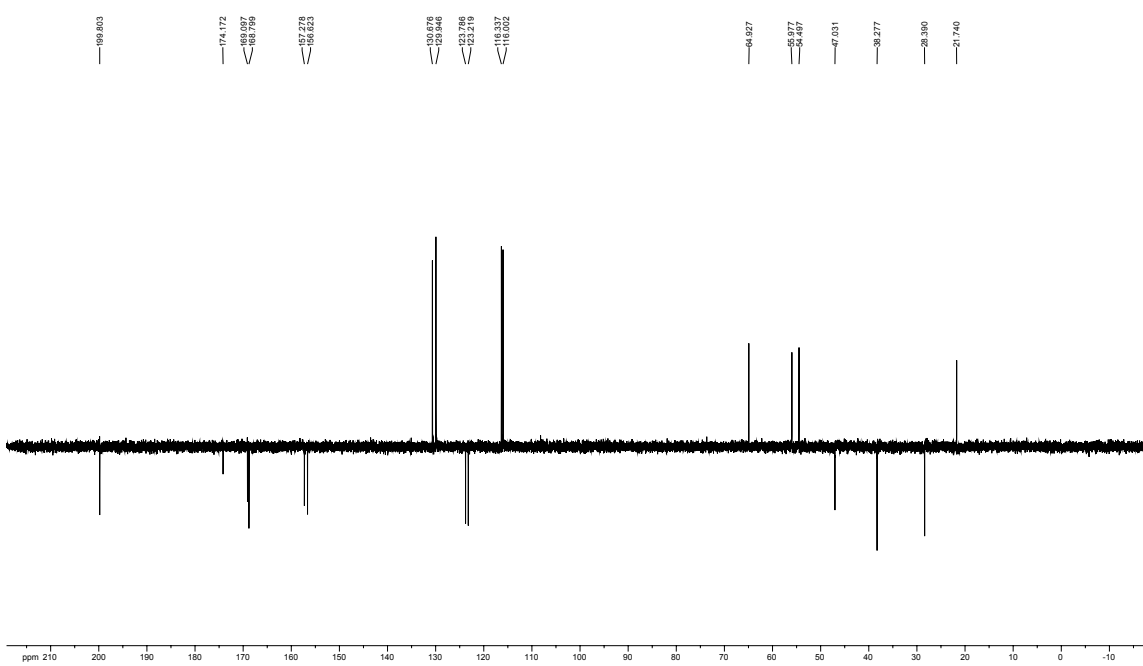

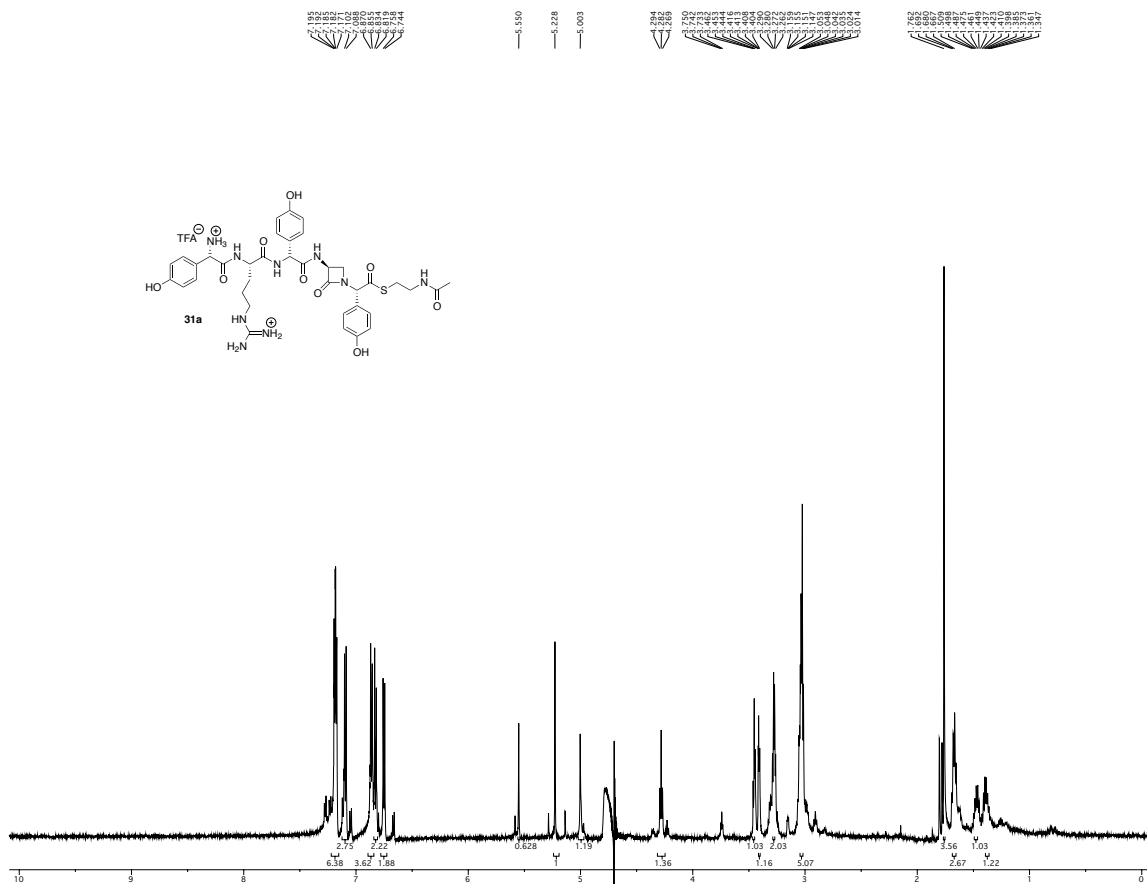

600 MHz <sup>1</sup>H-NMR Compound 31a – D<sub>2</sub>O

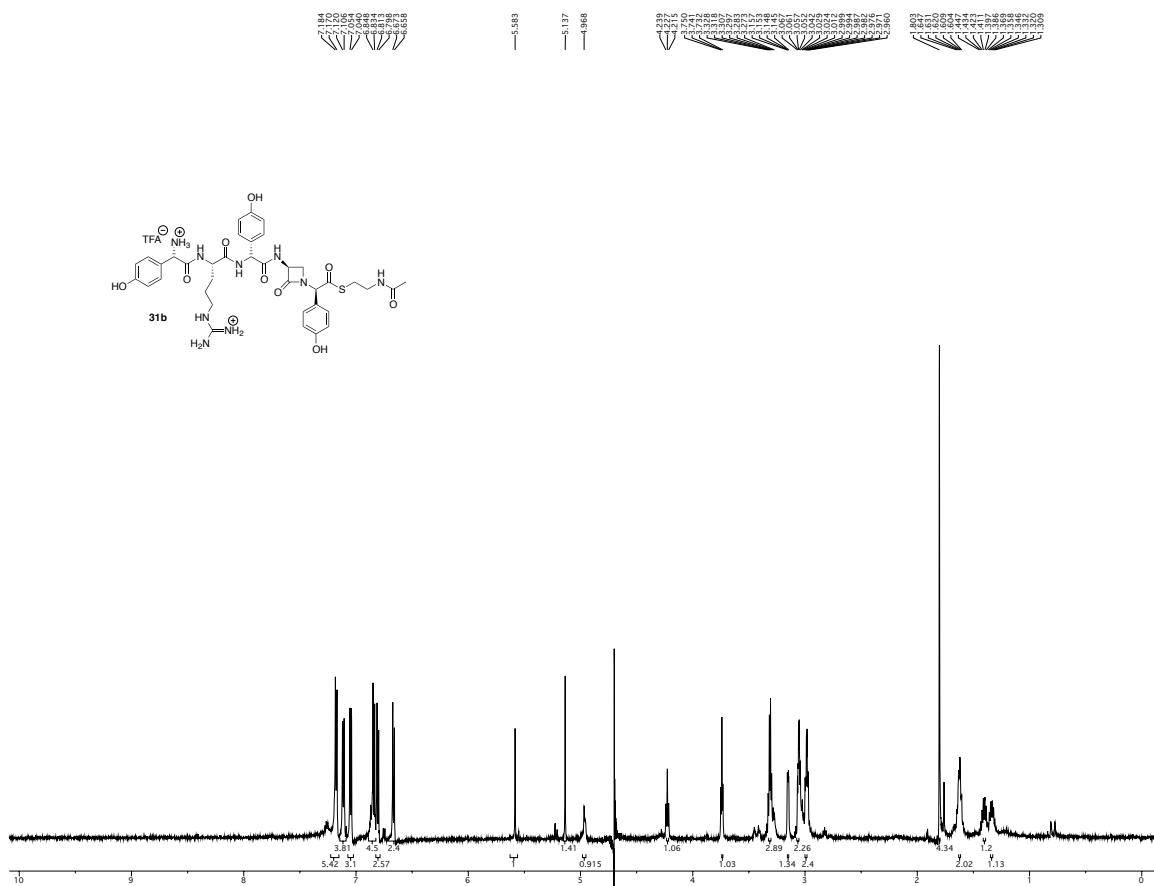

600 MHz <sup>1</sup>H-NMR Compound 31b – D<sub>2</sub>O

**HPLC Analysis of the Effect of 50 mM  $K_iPO_4$ , pH 7.5 on Epimerization of the C-terminal pHPG  $\alpha$ -Hydrogen of Synthesized Thioester Substrates.**

Analytical HPLC purifications were performed on an Agilent 1200 instrument multi-wavelength UV-Vis detector in conjunction with a reverse phase Luna 5u phenyl hexyl analytical column (250 x 4.60mm ID) using Analytical Method A as described previously.



Chemical Epimerization of 12a to 12b at pH 7.5

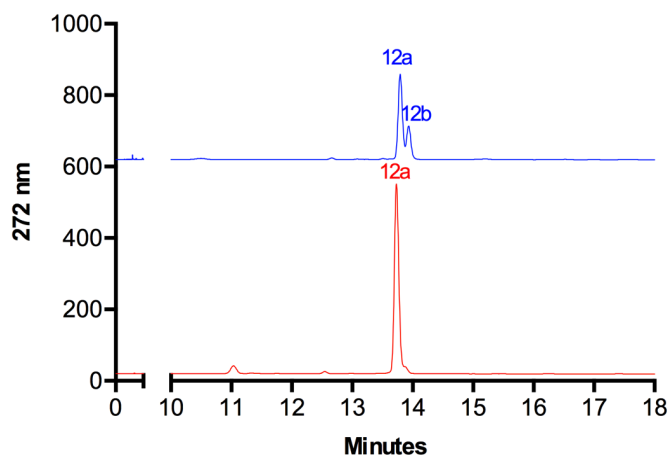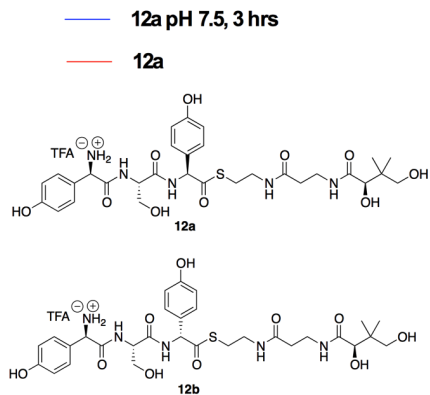

Chemical Epimerization of 12b to 12a at pH 7.5

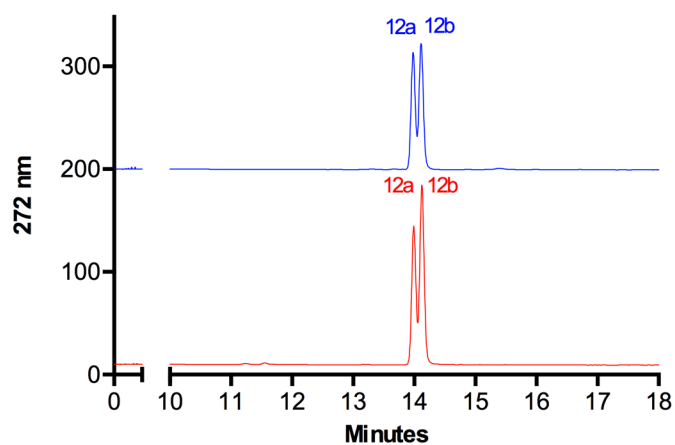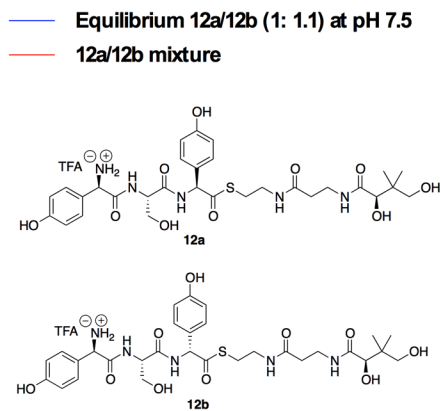

Chemical Epimerization of 17a/17b Mixture at pH 7.5

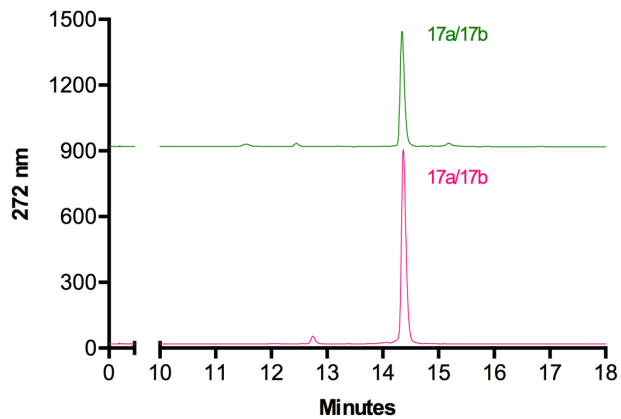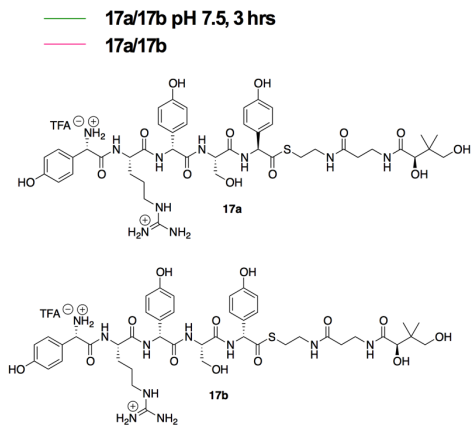

Chemical Epimerization of 19a/19b Mixture at pH 7.5

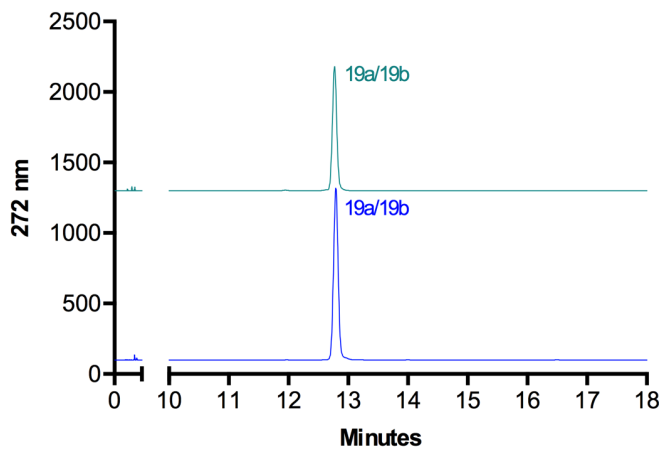

— 19a/19b pH 7.5, 3 hrs  
— 19a/19b

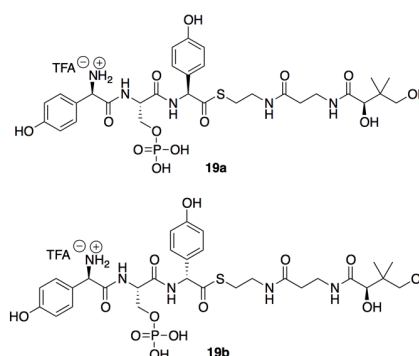

Chemical Epimerization of 21a to 21b at pH 7.5

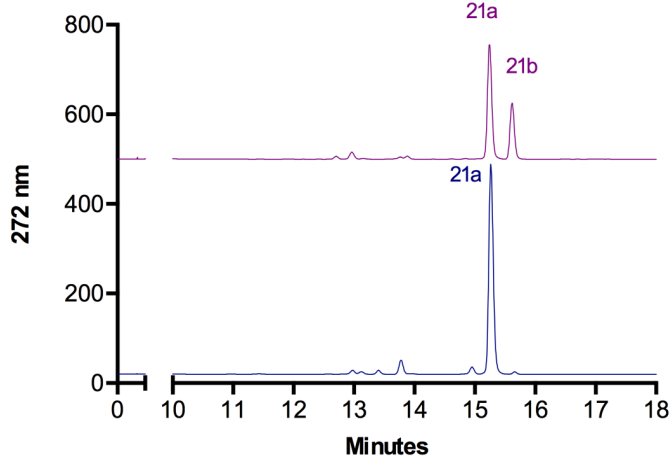

— 21a pH 7.5, 3hrs  
— 21a

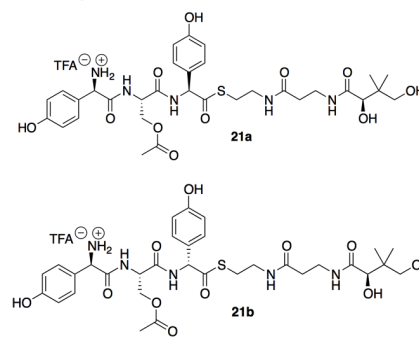

Chemical Epimerization of 21b to 21a at pH 7.5

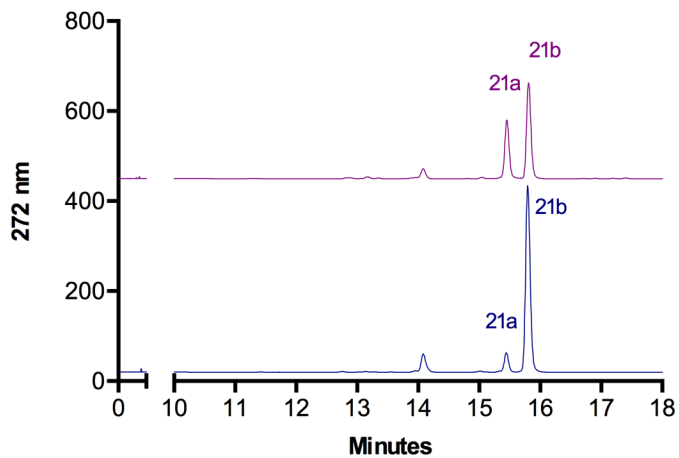

— 21b pH 7.5, 3hrs  
— 21b

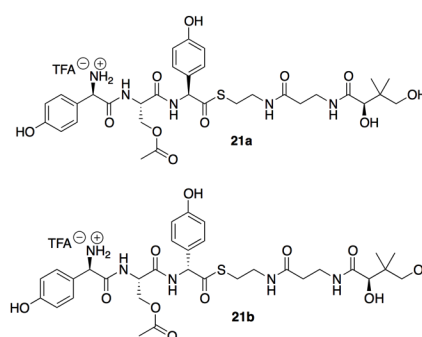

### Chemical Epimerization of 29a to 29b at pH 7.5

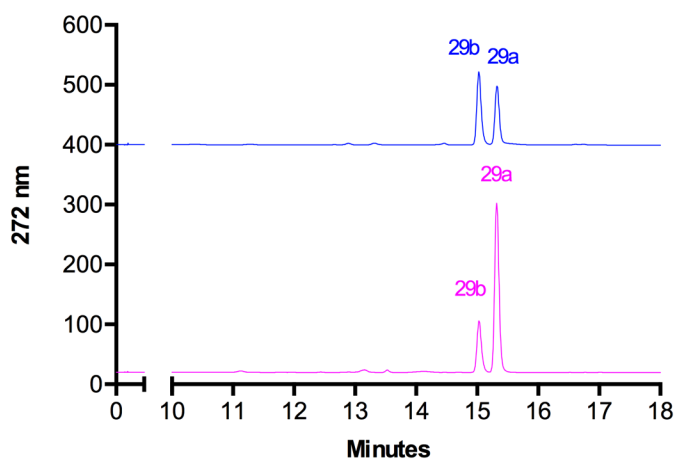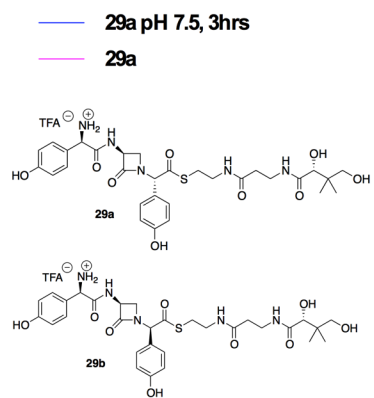

### Chemical Epimerization of 29b to 29a at pH 7.5

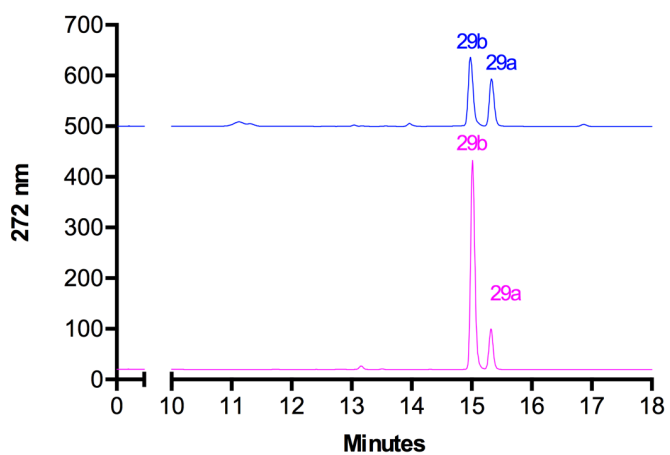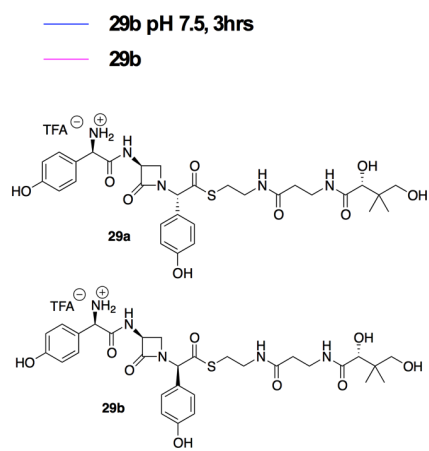

Chemical Epimerization of 31a to 31b at pH 7.5

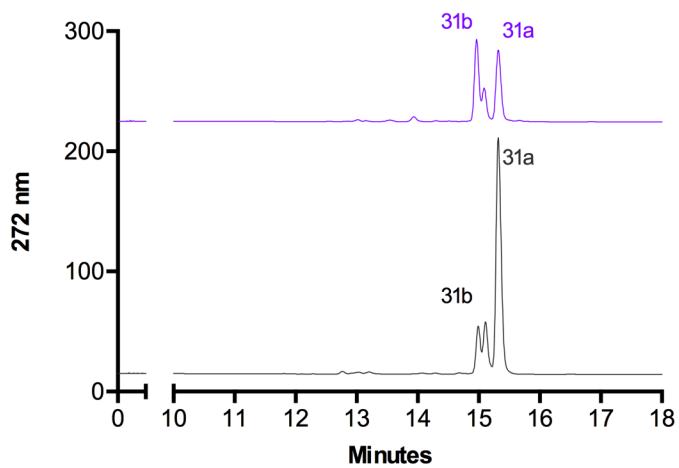

— 31a pH 7.5, 3hrs  
— 31a

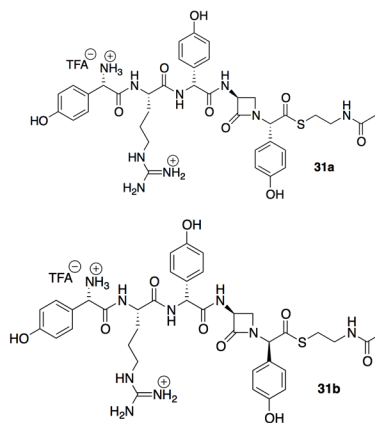

Chemical Epimerization of 31b to 31a at pH 7.5

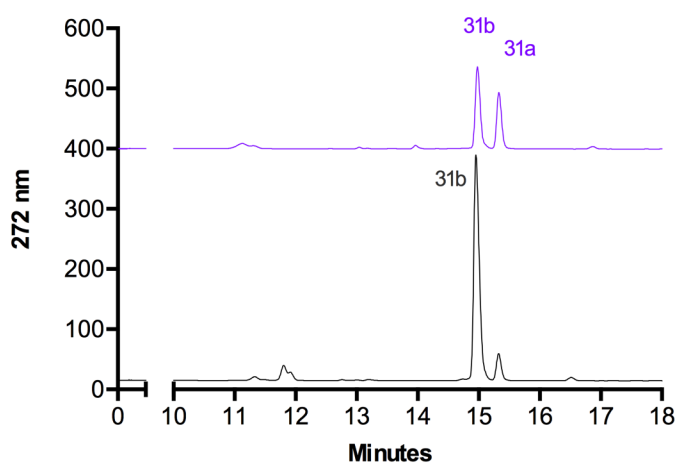

— 31b pH 7.5, 3hrs  
— 31b

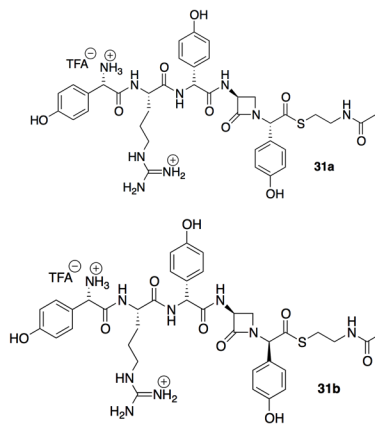

Supplement: NIHMS532311-supplement-1_si_001.pdf [file NIHMS532311-supplement-1_si_001.pdf]
